# Supplementary material for: Microvertebrate faunal assemblages of the Favel Formation (late Cenomanian-middle Turonian) of Manitoba, Canada
Source: PeerJ. 2023 Aug 3;11:e15493. doi: 10.7717/peerj.15493 (PMC10404398; doi:10.7717/peerj.15493)
Supplement: Supplemental Information 8 [file peerj-11-15493-s008.xlsx]

## Sheet: Sheet1
Taxon	MB Escarpment	Watino, AB	Lac de Bois, NWT	SD	KS	TX
Actinopterygii
Albula sp. undet.						x
Ananogmius sp.					x
Anomoeodus sp.					x	x
Apateodus sp.	x	x			x
Apsopelix anglicus	x				x	x
Aquilopiscis wilsoni			x
Avitosmerus canadensis			x
Bananogmius aratus					x
Bananogmius ellisensis					x
Bananogmius sp. undet.				x	x	x
Bardackichthys carteri						x
Belonostomus cf. B. longirostris		x			x	x
Boreiohydrias dayi			x
Cimolichthys cf. C. levesiensis	x	x	x
Coelodus streckeri					x
Coelorhynchus sp. undet.						x
Cumbaaichthys oxyrhynchus			x
Cylindracanthus sp. undet.					x
Dercetoides sp.		x
Elopopsis sp.	x
Enchodus gladiolus					x
Enchodus petrosus	x				x
Enchodus shumardi	x	x			x	x
Enchodus sp. undet.	x		x	x	x	x
Gillicus arcuatus	x	x			x
Grypodon sp. undet.						x
Gyrodus sp.					x
Hadrodus sp.					x	x
Holocentroides sp.					x
Ichthyodectes ctenodon	x	x	x		x	x
Laminospondylus transversus						x
Lepidotes mantelli						x
Leucichthyops sp.		x
Macropoma sp.					x
Micropycnodon kansasensis	x				x
Ornatipholis sahtu			x
?Osmeroides cf. O. delicatus		x
?Osmeroides cf. O. transversus		x
Osmeroides sp.		x	x
Pachyrhizodus caninus					x
Pachyrhizodus minimus	x				x	x
Pachyrhizodus sp. undet.				x	x	x
Paramicrodon estesi					x
Pentanogmius sp. undet.					x
Plethodus sp.						x
Protosphyraena sp.	x			x	x	x
Pycnodus sp. undet.						x
Saurodon sp. undet.						x
Syllaemus sp. undet.				x
Thrissopater intestinalis					x
Thryptodus loomisi	x					x
Thryptodus zitteli					x
Xiphactinus lowii					x
Xiphactinus sp.	x	x		x	x	x
Chondrichthyes
Anomotodon sp.					x
Archaeolamna ex. gr. kopingensis	x	x			x
Cantioscyllium decipiens					x
Carcharias amonensis				x	x
Carcharias sasktatchewanensis				x	x
Carcharias aff. C. striatula		x
Carcharias tenuiplicatus				x	x
Carcharias woodbinensis						x
Carcharias sp. undet.				x		x
Cardabiodon cf. ricki	x	x			x
Chiloscyllium greeni					x
Corax sp. undet.						x
Cretalamna ex. gr. appendiculata	x	x		x	x	x
Cretalamna serrata						x
Cretalamna sp. undet.	x	x			x	x
Cretodus crassidens					x	x
Cretodus semiplicatus		x			x	x
Cretodus sp. undet.	x			x	x	x
Cretomanta canadensis	x			x	x
Cretoxyrhina denticulata	x	x		x	x	x
Cretoxyrhina oxyrhinoides						x
Cretoxyrhina sp. undet.						x
Dallasiella willistoni		x			x
Dasyatis sp. undet.						x
Galeocerdo sp. undet.						x
Galeorhinus sp. undet.						x
Hybodus sp.		x
Ischyrhiza cf. I. mira	x				x
Ischyrhiza texana	x				x
Ischyrhiza sp. undet.						x
Isurus sp. undet.						x
Johnlongia parvidens		x			x
Lamna bicuspidatus						x
Lamna crassidens						x
Lamna falcatus						x
Lamna semiplicatus						x
Lamna sp. undet.						x
Leptostyrax crassidens					x
Leptostyrax macrorhiza						x
Leptostyrax sp. undet.						x
Meristodonoides rajkovichi		x
Meristodonoides sp.					x
Microscyliorhinus sp.	x
Odontaspis amonensis					x
Odontaspis parvidens				x	x
Odontaspis saskatchewanensis	x				x
Odontaspis subulata					x
Odontaspis watinensis		x			x
Odontaspis sp.					x	x
Onchopristis dunklei					x
Palaeoanacorax pawpawensis	x	x		x	x	x
Paranomotodon sp.					x
Polyacrodus illingsworthii						x
Polyacrodus sp.		x
Pseudocorax grantii						x
Pseudocorax laevis					x
Pseudocorax sp.					x
Pseudohypolophus mcnultyi						x
Ptychodus anonymus		x		x	x	x
Ptychodus decurrens					x	x
Ptychodus janevaii					x
Ptychodus latissimus						x
Ptychodus mammillaris					x	x
Ptychodus marginalis	x				x
Ptychodus mortoni					x	x
Ptychodus occidentalis	x			x	x	x
Ptychodus rhombodus	x				x
Ptychodus rugosus	x					x
Ptychodus whipplei				x	x	x
Ptychodus sp.	x	x		x	x	x
Ptychotrygon hooveri						x
Ptychotrygon sp.					x
Rhinobatos incertus	x	x		x	x
Rhinoptera sp. undet.						x
Roulletia canadensis	x
Scapanorhynchus aff. S. raphiodon	x	x		x	x
Scapanorhynchus texanus						x
Scapanorhynchus sp. undet.						x
Scyliorhinus arlingtonensis					x
Squalicorax curvatus	x			x	x	x
Squalicorax deckeri					x
Squalicorax falcatus	x	x		x	x	x
Squalicorax obliquus						x
Squalicorax parvidens					x
Synodontaspis liliae	x
Telodontaspis agassizensis	x				x
Reptilia
Adocus sp. undet.						x
Brachauchenius lucasi					x
Coniasaurus crassidens					x	x
Coniasaurus sp. undet.						x
Dallasaurus turneri						x
Deltasuchus motherali						x
Desmatochelys lowii					x
Elasmosaurus sp. undet.						x
?Libonectes morgani	x
Megacephalosaurus eulerti					x
Mosasaurus sp.					x
Plesiosaurus sp.				x	x	x
Polycotylus latipinnis	x
Polyptychodon hudsoni						x
Polyptychodon interruptus						x
Polyptychodon sp. undet.						x
Protostega sp. undet.						x
Pteranodon sp.				x		x
Terminonaris robusta	x
Thalassomedon dentonensis						x
Toxochelys sp.					x	x
Trinacromerum bentonianum?	x				x
Crocodilia indet.						x
Mosasauridae indet.	x			x	x	x
Plesiosauria indet.	x			x	x	x
Pliosauridae gen. et sp. nov.	x
Pterosauria indet.					x	x
Testudines indet.	x			x	x	x
Aves
cf. Ichthyornis sp.	x	x			x
Aves undet.						x
Vertebrata undet.
Vertebrate A	x
Total No. Genera	38	28	9	21	61	53
Total No. Species	48	32	9	29	95	87
Total No. of Shared Genera	-	16	3	14	27	15
Total No. of Shared Species	-	17	2	14	32	16
Coefficient of Community, Genera	-	0.484848	0.12766	0.474576	0.545455	0.32967
Coefficient of Community, Species	-	0.425	0.0701754	0.363636	0.447552	0.237037
