# Supplementary material for: Microvertebrate faunal assemblages of the Favel Formation (late Cenomanian-middle Turonian) of Manitoba, Canada
Source: PeerJ. 2023 Aug 3;11:e15493. doi: 10.7717/peerj.15493 (PMC10404398; doi:10.7717/peerj.15493)
Supplement: Supplemental Information 9 [file peerj-11-15493-s009.xlsx]

## Sheet: MC Near Miami
MM #	Horizon	Site	Phylum	Taxon	Element	Count	Notes
I-	Marco Calcarenite	MC Ditch	Mollusca	Inoceramus sp.	Valve fragments	3
V-3269	Marco Calcarenite	MC Ditch	Actinopterygii	Apsopelix anglicus?	caudal fin fragments	11
V-3270	Marco Calcarenite	MC Ditch	Chondrichthyes	Rhinobatos incertus	Imaged Teeth (on cardstock slide)	2	Fig. 13C,D of Kilmury et al. (2022); on slide
V-3271	Marco Calcarenite	MC Ditch	Chondrichthyes	Cretomanta canadensis	Imaged Tooth (on cardstock slide)	1	on slide
V-3272	Marco Calcarenite	MC Ditch	Aves	Ichthyornis?	Bird Limb Elements	16
V-3276	Marco Calcarenite	MC Ditch	Actinopterygii		angulars	3	Second tray down, all imaged
V-3277	Marco Calcarenite	MC Ditch	Actinopterygii		Atlas + near atlas vertebrae	>10
V-3278	Marco Calcarenite	MC Ditch	Actinopterygii	cf. Gadidae	Atlas Process	3
V-3279	Marco Calcarenite	MC Ditch	Actinopterygii		basibranchial + basibranchial Pl.	8
V-3280	Marco Calcarenite	MC Ditch	Actinopterygii	Undet.	Basihyal	1
V-3281	Marco Calcarenite	MC Ditch	Actinopterygii		basipterygium	5
V-3282	Marco Calcarenite	MC Ditch	Actinopterygii		branchiostegal ray fragments	27
V-3283	Marco Calcarenite	MC Ditch	Actinopterygii	cf. Gadidae	ceratobranchial	2
V-3284	Marco Calcarenite	MC Ditch	Actinopterygii	cf. Pleuronectidae	ceratobranchial	5
V-3285	Marco Calcarenite	MC Ditch	Actinopterygii	cf. Salmonidae	ceratobranchial	6
V-3286	Marco Calcarenite	MC Ditch	Actinopterygii	cf. Scorpaenidae	ceratobranchial	1
V-3287	Marco Calcarenite	MC Ditch	Actinopterygii		ceratohyals	3
V-3288	Marco Calcarenite	MC Ditch	Actinopterygii		cleithra	>10
V-3289	Marco Calcarenite	MC Ditch	Undet.		coprolites	>10
V-3290	Marco Calcarenite	MC Ditch	Undet.	Undet.	Coprolite with Indeterminent Fragment	1
V-3291	Marco Calcarenite	MC Ditch	Actinopterygii		ectopterygoid	2
V-3292	Marco Calcarenite	MC Ditch	Actinopterygii	Undet.	epibranchial	2
V-3293	Marco Calcarenite	MC Ditch	Actinopterygii		epihyals	1
V-3294	Marco Calcarenite	MC Ditch	Actinopterygii		epiotic or prootic	4
V-3295	Marco Calcarenite	MC Ditch	Actinopterygii		exoccipitals?	5
V-3296	Marco Calcarenite	MC Ditch	Actinopterygii	Undet.	fish jaws	4
V-3297	Marco Calcarenite	MC Ditch	Actinopterygii		fish scapulae	3
V-3298	Marco Calcarenite	MC Ditch	Actinopterygii	cf. Gadidae (partial)	frontals	4
V-3299	Marco Calcarenite	MC Ditch	Actinopterygii	cf. Pleuronectidae	frontals	3
V-3300	Marco Calcarenite	MC Ditch	Actinopterygii	cf. Scorpaenidae	frontals	1
V-3301	Marco Calcarenite	MC Ditch	Actinopterygii		frontals partials	7
V-3302	Marco Calcarenite	MC Ditch	Actinopterygii	Species A	frontals type 1	5
V-3303	Marco Calcarenite	MC Ditch	Actinopterygii		haemal spines	>10
V-3304	Marco Calcarenite	MC Ditch	Actinopterygii		hyomandibular	2
V-3305	Marco Calcarenite	MC Ditch	Actinopterygii		hypobrachials	4
V-3306	Marco Calcarenite	MC Ditch	Actinopterygii		hypurals	10
V-3307	Marco Calcarenite	MC Ditch	Actinopterygii		interopercles	2
V-3308	Marco Calcarenite	MC Ditch	Actinopterygii	Pachyrizodus minimus	jaw fragment triangular	1
V-3309	Marco Calcarenite	MC Ditch	Actinopterygii	cf. Gadidae	maxilla	3
V-3310	Marco Calcarenite	MC Ditch	Actinopterygii	cf. Scorpaenidae	maxilla	2
V-3311	Marco Calcarenite	MC Ditch	Actinopterygii		mesocoracoid or hyomandibular	2	one broken in half (3 pieces)
V-3312	Marco Calcarenite	MC Ditch	Actinopterygii		mesopterygoid	4
V-3313	Marco Calcarenite	MC Ditch	Actinopterygii		metapterygoid	2
V-3314	Marco Calcarenite	MC Ditch	Actinopterygii		opercles	4
V-3315	Marco Calcarenite	MC Ditch	Actinopterygii	Undet.	opisthotic	1
V-3316	Marco Calcarenite	MC Ditch	Actinopterygii	cf. Albulidae	palatine	1
V-3317	Marco Calcarenite	MC Ditch	Actinopterygii	Undet.	palatine	2
V-3318	Marco Calcarenite	MC Ditch	Actinopterygii	Enchodus	palatine teeth	5
V-3319	Marco Calcarenite	MC Ditch	Actinopterygii	Undet.	parasphenoid	2
V-3320	Marco Calcarenite	MC Ditch	Actinopterygii	cf. Gadidae	parietal	3
V-3321	Marco Calcarenite	MC Ditch	Actinopterygii	Undet.	parietals	1
V-3322	Marco Calcarenite	MC Ditch	Actinopterygii	cf. Ichthyodectes ctenodon	pectoral fin elements	6
V-3323	Marco Calcarenite	MC Ditch	Actinopterygii		possible coracoids	5
V-3324	Marco Calcarenite	MC Ditch	Actinopterygii		possible dent.	7
V-3325	Marco Calcarenite	MC Ditch	Actinopterygii		possible nasals	3
V-3326	Marco Calcarenite	MC Ditch	Actinopterygii		possible parasphenoid fragment	3
V-3327	Marco Calcarenite	MC Ditch	Actinopterygii		possible supra-cleithrum	4
V-3328	Marco Calcarenite	MC Ditch	Actinopterygii		post temporal	1
V-3329	Marco Calcarenite	MC Ditch	Actinopterygii	cf. Gadidae	prefrontals	3
V-3330	Marco Calcarenite	MC Ditch	Actinopterygii	cf. Scorpaenidae	prefrontals	1
V-3331	Marco Calcarenite	MC Ditch	Actinopterygii		prefrontals	5
V-3332	Marco Calcarenite	MC Ditch	Actinopterygii		premaxillae	9
V-3333	Marco Calcarenite	MC Ditch	Actinopterygii		preopercles	5
V-3334	Marco Calcarenite	MC Ditch	Actinopterygii		quadrates	29
V-3335	Marco Calcarenite	MC Ditch	Actinopterygii		retroarticular?	2
V-3336	Marco Calcarenite	MC Ditch	Actinopterygii		ribs	>10
V-3337	Marco Calcarenite	MC Ditch	Actinopterygii		scales	>10
V-3338	Marco Calcarenite	MC Ditch	Actinopterygii		slightly curved ribs	11
V-3339	Marco Calcarenite	MC Ditch	Actinopterygii		subopercles	5
V-3340	Marco Calcarenite	MC Ditch	Actinopterygii		suborbital?	4
V-3341	Marco Calcarenite	MC Ditch	Actinopterygii		supratemporal	1
V-3342	Marco Calcarenite	MC Ditch	Actinopterygii	Apateodus?	teeth	1
V-3343	Marco Calcarenite	MC Ditch	Actinopterygii	Protosphyraena?	teeth	1
V-3344	Marco Calcarenite	MC Ditch	Actinopterygii		undeterminate fish tooth	2
V-3345	Marco Calcarenite	MC Ditch	Actinopterygii		urohyal	2
V-3346	Marco Calcarenite	MC Ditch	Actinopterygii		vertebrae	>10
V-3347	Marco Calcarenite	MC Ditch	Actinopterygii		distorted vertebrae	>10
V-3348	Marco Calcarenite	MC Ditch	Actinopterygii		Partial small vertebrae	>10
V-3349	Marco Calcarenite	MC Ditch	Actinopterygii		Complete small vertebrae	>10
V-3350	Marco Calcarenite	MC Ditch	Actinopterygii		Partial medium vertebrae	>10
V-3351	Marco Calcarenite	MC Ditch	Actinopterygii		Complete medium vertebrae	>10
V-3352	Marco Calcarenite	MC Ditch	Actinopterygii		Partial large vertebrae	4
V-3353	Marco Calcarenite	MC Ditch	Actinopterygii		Complete large vertebrae	7
V-3354	Marco Calcarenite	MC Ditch	Actinopterygii		large fish vertebrae	13
V-3355	Marco Calcarenite	MC Ditch	Actinopterygii		Ultimate & penultimate vertebrae (tail vertebrae)	>10
V-3356	Marco Calcarenite	MC Ditch	Undet.		reptile? vertebrae	8
V-3357	Marco Calcarenite	MC Ditch	Undet.		scale with spike?	1
V-3358	Marco Calcarenite	MC Ditch	Undet.		skull element in water (now dry)	~4	needs further examination
V-3359	Marco Calcarenite	MC Ditch	Undet.		surface striations	2
V-3360	Marco Calcarenite	MC Ditch	Undet.		tooth embedded in fragment	1
V-3361	Marco Calcarenite	MC Ditch	Undet.		Undet. limb Element	1
V-3362	Marco Calcarenite	MC Ditch	Undet.		undeterminate fossils with well-defined features	>10
V-3363	Marco Calcarenite	MC Ditch	Undet.		undeterminate small	>10
V-3364	Marco Calcarenite	MC Ditch	Undet.		undeterminate medium	>10
V-3365	Marco Calcarenite	MC Ditch	Undet.		undeterminate large	5
V-3366-A	Marco Calcarenite	MC Ditch	Chondrichthyes		Complete small shark vertebrae (ray or skate)	1	Fig. 13E of Kilmury et al. (2022); in vial with V-3366-B
V-3366-B	Marco Calcarenite	MC Ditch	Chondrichthyes		Complete small shark vertebrae (ray or skate)	1
V-3367	Marco Calcarenite	MC Ditch	Chondrichthyes		lamniform tooth undeterminate	1
V-3368	Marco Calcarenite	MC Ditch	Chondrichthyes	Undet.	Shark root (lobe)	1
V-3369	Marco Calcarenite	MC Ditch	Chondrichthyes	Rhinobatos incertus	tooth	1
V-3370	Marco Calcarenite	MC Ditch	Chondrichthyes	Squalicorax curvatus	Shark tooth (complete)	1
V-3371	Marco Calcarenite	MC Ditch	Chondrichthyes	Squalicorax	tooth bases (roots)	2
V-3372	Marco Calcarenite	MC Ditch	Reptilia	Testudine	possible turtle carapace	1
V-3373	Marco Calcarenite	MC Ditch	Reptilia	Testudine	turtle femur proximal ends	2
V-3374	Marco Calcarenite	MC Ditch	Reptilia	Testudine	turtle rib	1
V-3375	Marco Calcarenite	MC Ditch	Aves	Ichthyornis?	Bird Humeri	4
V-3376	Marco Calcarenite	MC Ditch	Aves	Ichthyornis?	Possible Bird Bones (undet. elements)	3
V-3377	Marco Calcarenite	MC Ditch	Aves	Ichthyornis?	possible bird ribs (double head ribs)	4
V-3378	Marco Calcarenite	MC Ditch	Aves	Ichthyornis?	radius+ulna	1
V-3379	Marco Calcarenite	MC Ditch	Actinopterygii		Atlas-1	12	Glued on cardstock slide
V-3380	Marco Calcarenite	MC Ditch	Actinopterygii		SC 1-60 Complete small vertebrae	60
V-3381	Marco Calcarenite	MC Ditch	Actinopterygii		SC 61-120 Complete small vertebrae	37
V-3382	Marco Calcarenite	MC Ditch	Actinopterygii		Partial small vertebrae (on slide)	14
V-3383	Marco Calcarenite	MC Ditch	Actinopterygii		MC_1 Complete medium vertebrae	17
V-3384	Marco Calcarenite	MC Ditch	Actinopterygii		MP_1 Partial medium vertebrae	7
V-3385	Marco Calcarenite	MC Ditch	Actinopterygii		LC_1 Complete large vertebrae	13
V-3386	Marco Calcarenite	MC Ditch	Actinopterygii		Partial large vertebrae (on slide)	26
V-3387	Marco Calcarenite	MC Ditch	Chondrichthyes	Ischyrhiza texana	Imaged Teeth	2
V-3388	Marco Calcarenite	MC Ditch	Chondrichthyes	Undet.	Medium-sized chondrichthyan vertebra (encased in host rock with sides and 1 articular surface exposed)	1
V-3544	Marco Calcarenite	MC Ditch	Chondrichthyes	Vertebrate A	New bladed and serrated tooth species (holotype specimen)	1	Fig. 4A-D of Kilmury et al. (2022); on slide
V-3545	Marco Calcarenite	MC Ditch	Chondrichthyes	Vertebrate A	New Shark Teeth (paratypes; 3 imaged; in glass covered slide)	6	on slide
V-3546	Marco Calcarenite	MC Ditch	Chondrichthyes	Vertebrate A	New Shark Teeth (paratype)	1	Fig. 4F of Kilmury et al. (2022); in vial
V-3575	Marco Calcarenite	MC Ditch	Actinopterygii	Xiphactinus	Tooth crown (partial)	1	Fig. 9A of Kilmury et al. (2022)
V-3576	Marco Calcarenite	MC Ditch	Actinopterygii		undeterminate fish tooth	1	Fig. 9B of Kilmury et al. (2022)
V-3577	Marco Calcarenite	MC Ditch	Actinopterygii	Protosphyraena	Tooth crown (partial)	1	Fig. 9C of Kilmury et al. (2022)
V-3578	Marco Calcarenite	MC Ditch	Actinopterygii	Xiphactinus	Tooth crown (partial)	1	Fig. 9D of Kilmury et al. (2022)
V-3579	Marco Calcarenite	MC Ditch	Actinopterygii	Enchodus petrosus	palatine tooth	1	Fig. 9E of Kilmury et al. (2022)
V-3580	Marco Calcarenite	MC Ditch	Actinopterygii	Protosphyraena	Tooth	1	Fig. 9F of Kilmury et al. (2022)
V-3581	Marco Calcarenite	MC Ditch	Actinopterygii	Apateodus?	Tooth	1	Fig. 9G of Kilmury et al. (2022)
V-3582	Marco Calcarenite	MC Ditch	Actinopterygii	Micropycnodon kansasensis	prearticular	1	Fig. 9H of Kilmury et al. (2022)
V-3583	Marco Calcarenite	MC Ditch	Actinopterygii	Pachyrizodus minimus	jaw fragment triangular	1	Fig. 10A of Kilmury et al. (2022)
V-3584	Marco Calcarenite	MC Ditch	Actinopterygii	cf. Gadidae	maxilla	1	Fig. 10B of Kilmury et al. (2022)
V-3585	Marco Calcarenite	MC Ditch	Actinopterygii	cf. Scorpaenidae	maxilla	1	Fig. 10C of Kilmury et al. (2022)
V-3586	Marco Calcarenite	MC Ditch	Actinopterygii		undet. maxilla	1	Fig. 10D of Kilmury et al. (2022)
V-3587	Marco Calcarenite	MC Ditch	Actinopterygii	Micropycnodon kansasensis	dentary	1	Fig. 10E of Kilmury et al. (2022)
V-3588	Marco Calcarenite	MC Ditch	Actinopterygii		undet. maxilla	1	Fig. 10F of Kilmury et al. (2022)
V-3589	Marco Calcarenite	MC Ditch	Actinopterygii	Micropycnodon kansasensis	tooth plate	1	Fig. 10G of Kilmury et al. (2022)
V-3590	Marco Calcarenite	MC Ditch	Actinopterygii		dent.	1	Fig. 10H of Kilmury et al. (2022)
V-3591	Marco Calcarenite	MC Ditch	Actinopterygii	Micropycnodon kansasensis	premaxilla	1	Fig. 10I of Kilmury et al. (2022)
V-3592	Marco Calcarenite	MC Ditch	Actinopterygii		premaxilla	1	Fig. 10J of Kilmury et al. (2022)
V-3593	Marco Calcarenite	MC Ditch	Actinopterygii	cf. Gadidae 1 (mostly complete)	frontal	1	Fig. 11A of Kilmury et al. (2022)
V-3594	Marco Calcarenite	MC Ditch	Actinopterygii	cf. Pleuronectidae	frontal	1	Fig. 11B of Kilmury et al. (2022)
V-3595	Marco Calcarenite	MC Ditch	Actinopterygii	cf. Scorpaenidae	frontal	1	Fig. 11C of Kilmury et al. (2022)
V-3596	Marco Calcarenite	MC Ditch	Actinopterygii	Species A	frontal type 1	1	Fig. 11D of Kilmury et al. (2022)
V-3597	Marco Calcarenite	MC Ditch	Actinopterygii	cf. Pleuronectidae	frontal (right)	1	Fig. 11E of Kilmury et al. (2022)
V-3598	Marco Calcarenite	MC Ditch	Actinopterygii	cf. Pleuronectidae	frontal (right)	1	Fig. 11F of Kilmury et al. (2022)
V-3600	Marco Calcarenite	MC Ditch	Actinopterygii		sphenotic	1	Fig. 11H of Kilmury et al. (2022)
V-3602	Marco Calcarenite	MC Ditch	Actinopterygii		prefrontal	1	Fig. 11J of Kilmury et al. (2022)
V-3604	Marco Calcarenite	MC Ditch	Actinopterygii	c.f. Salmonidae	posttemporal	1	Fig. 11L of Kilmury et al. (2022)
V-3605	Marco Calcarenite	MC Ditch	Actinopterygii		basioccipital	1	Fig. 11M of Kilmury et al. (2022)
V-3606	Marco Calcarenite	MC Ditch	Actinopterygii		symplectic	1	Fig. 11N of Kilmury et al. (2022)
V-3607	Marco Calcarenite	MC Ditch	Actinopterygii	cf. Pleuronectidae	ceratobranchial	1	Fig. 12A of Kilmury et al. (2022)
V-3608	Marco Calcarenite	MC Ditch	Actinopterygii	cf. Gadidae	ceratobranchial	1	Fig. 12B of Kilmury et al. (2022)
V-3609	Marco Calcarenite	MC Ditch	Actinopterygii		fish radial (2 pieces)	1	Fig. 12C of Kilmury et al. (2022)
V-3610	Marco Calcarenite	MC Ditch	Actinopterygii		coracoid	1	Fig. 12D of Kilmury et al. (2022)
V-3611	Marco Calcarenite	MC Ditch	Actinopterygii		scapula	1	Fig. 12E of Kilmury et al. (2022)
V-3612	Marco Calcarenite	MC Ditch	Actinopterygii	Apsopelix anglicus?	caudal fin fragment	1	Fig. 12F of Kilmury et al. (2022)
V-3613	Marco Calcarenite	MC Ditch	Actinopterygii	Apsopelix anglicus?	caudal fin fragment	1	Fig. 12G of Kilmury et al. (2022)
V-3614	Marco Calcarenite	MC Ditch	Actinopterygii		epural	1	Fig. 12H of Kilmury et al. (2022)
V-3615	Marco Calcarenite	MC Ditch	Chondrichthyes	Palaeoanacorax pawpawensis	Shark tooth (complete)	1	Fig. 13A of Kilmury et al. (2022)
V-3616	Marco Calcarenite	MC Ditch	Chondrichthyes	Palaeoanacorax pawpawensis	Shark tooth (complete)	1
V-3617	Marco Calcarenite	MC Ditch	Chondrichthyes	Ischyrhiza texana	Imaged Teeth	1	Fig. 13F of Kilmury et al. (2022); on slide
V-3618	Marco Calcarenite	MC Ditch	Chondrichthyes	Ischyrhiza cf. mira	rostral tooth	1	Fig. 13G of Kilmury et al. (2022)
V-3619	Marco Calcarenite	MC Ditch	Reptilia	Testudine	Turtle carapace fragment	1	Fig. 14A of Kilmury et al. (2022)
V-3620	Marco Calcarenite	MC Ditch	Reptilia	Testudine	turtle femur proximal end (left)	1	Fig. 14B of Kilmury et al. (2022)
V-3622	Marco Calcarenite	MC Ditch	Reptilia	Testudine	turtle rib	1	Fig. 14D of Kilmury et al. (2022)
V-3623	Marco Calcarenite	MC Ditch	Reptilia	Squamata	tooth	1	Fig. 14E of Kilmury et al. (2022)
V-3624	Marco Calcarenite	MC Ditch	Aves	Ichthyornis?	Bird rib	1	Fig. 14F of Kilmury et al. (2022)
V-3625	Marco Calcarenite	MC Ditch	Aves	Ichthyornis?	Bird Humeri	1	Fig. 14G of Kilmury et al. (2022)
V-3627	Marco Calcarenite	MC Ditch	Aves	Ichthyornis?	Bird Femur	1	Fig. 14I of Kilmury et al. (2022)

## Sheet: MC Ochre R
MM #	Horizon	Site	Phylum	Taxon	Element	Count	Notes
V-3621	Marco Calcarenite	MC Ochre R	Reptilia		Turtle Femur Proximal Ends	1	Fig.14C of Kilmury et al. (2022)
V-3626	Marco Calcarenite	MC Ochre R	Aves		Bird Humerus (proximal end)	1	Fig.14H of Kilmury et al. (2022)
V-3547	Marco Calcarenite	MC Ochre R	Chondrichthyes	Vertebrate A	Tooth	1	Fig. 4E of Kilmury et al. (2022)
V-3599	Marco Calcarenite	MC Ochre R	Actinopterygii		Prootic	1	Fig.11G of Kilmury et al. (2022)
V-3601	Marco Calcarenite	MC Ochre R	Actinopterygii		Quadrate	1	Fig.11I of Kilmury et al. (2022)
V-3603	Marco Calcarenite	MC Ochre R	Actinopterygii	c.f. Gadidae	Mesethmoid	1	Fig.11K of Kilmury et al. (2022)
V-3411	Marco Calcarenite	MC Ochre R	Actinopterygii		Ribs	2	Imaged for fossil sorting guide
V-3413	Marco Calcarenite	MC Ochre R	Actinopterygii	Undet.	Scales	3	Imaged for fossil sorting guide
V-3389	Marco Calcarenite	MC Ochre R	Actinopterygii		Angular	1
V-3396	Marco Calcarenite	MC Ochre R	Actinopterygii	Apsopelix anglicus?	Caudal Fins	6
V-3419	Marco Calcarenite	MC Ochre R	Actinopterygii		Atlas Vertebrae (not measured)	5
V-3431	Marco Calcarenite	MC Ochre R	Actinopterygii		Atlas-1 (measured)	7
V-3390	Marco Calcarenite	MC Ochre R	Actinopterygii		Basioccipital	1
V-3391	Marco Calcarenite	MC Ochre R	Actinopterygii		Brachiostegal Rays	6
V-3392	Marco Calcarenite	MC Ochre R	Actinopterygii	cf Pleuronectidae	Ceratobranchial	3
V-3393	Marco Calcarenite	MC Ochre R	Actinopterygii	cf Salmonidae	Ceratobranchial	2
V-3394	Marco Calcarenite	MC Ochre R	Actinopterygii	cf Scorpaenidae	Ceratobranchial	1
V-3395	Marco Calcarenite	MC Ochre R	Actinopterygii		Ceratohyal	1
V-3428	Marco Calcarenite	MC Ochre R	Actinopterygii		Complete Fish Vert. Not Measured	1
V-3424	Marco Calcarenite	MC Ochre R	Actinopterygii		Complete Large Verts.	9
V-3422	Marco Calcarenite	MC Ochre R	Actinopterygii		Complete Medium Verts.	24
V-4320	Marco Calcarenite	MC Ochre R	Actinopterygii		Complete Small Verts.	>10
V-3427	Marco Calcarenite	MC Ochre R	Actinopterygii		Complete Vertebrae (All Sizes; Measured)	>10
V-3435	Marco Calcarenite	MC Ochre R	Actinopterygii		DC-1 Distal caudal vertebrae	7
V-3397	Marco Calcarenite	MC Ochre R	Actinopterygii		Dentaries	2
V-3398	Marco Calcarenite	MC Ochre R	Actinopterygii	cf Pleuronectidae	Frontals	1
V-3399	Marco Calcarenite	MC Ochre R	Actinopterygii		Haemal Spines	14
V-3400	Marco Calcarenite	MC Ochre R	Actinopterygii		Hyomandibular	1
V-3430	Marco Calcarenite	MC Ochre R	Actinopterygii		Interesting Fish Vert. Complete	1
V-3401	Marco Calcarenite	MC Ochre R	Actinopterygii		Interhyal	1
V-3416	Marco Calcarenite	MC Ochre R	Actinopterygii	Undet.	Tooth	1
V-3434	Marco Calcarenite	MC Ochre R	Actinopterygii		LC-1 Complete large vertebrae	1
V-3402	Marco Calcarenite	MC Ochre R	Actinopterygii	cf Scorpaenidae	Maxilla	2
V-3403	Marco Calcarenite	MC Ochre R	Actinopterygii	Undet.	Maxillae Undet.	1
V-3432	Marco Calcarenite	MC Ochre R	Actinopterygii		MC-1 Complete medium vertebrae	11
V-3404	Marco Calcarenite	MC Ochre R	Actinopterygii	Undet.	Mesopterygiod	1
V-3433	Marco Calcarenite	MC Ochre R	Actinopterygii		MP-1 Partial medium vertebrae	3
V-3405	Marco Calcarenite	MC Ochre R	Actinopterygii		Opercles	1
V-3406	Marco Calcarenite	MC Ochre R	Actinopterygii		Otoliths	2
V-3425	Marco Calcarenite	MC Ochre R	Actinopterygii		Partial Large Verts.	>10
V-3423	Marco Calcarenite	MC Ochre R	Actinopterygii		Partial Medium Verts.	>10
V-3421	Marco Calcarenite	MC Ochre R	Actinopterygii		Partial Small Verts.	>10
V-3429	Marco Calcarenite	MC Ochre R	Actinopterygii		Partial Vertebrae (All Sizes)	>10
V-3426	Marco Calcarenite	MC Ochre R	Actinopterygii		Penultimate vertebra	1
V-3407	Marco Calcarenite	MC Ochre R	Actinopterygii		Possible Hypurals	12
V-3408	Marco Calcarenite	MC Ochre R	Actinopterygii		Premaxillae	4
V-3409	Marco Calcarenite	MC Ochre R	Actinopterygii		Quadrates	4
V-3410	Marco Calcarenite	MC Ochre R	Actinopterygii		Ribs	>10
V-3412	Marco Calcarenite	MC Ochre R	Actinopterygii		Scales	>10
V-3414	Marco Calcarenite	MC Ochre R	Actinopterygii		Subopercle	1
V-3415	Marco Calcarenite	MC Ochre R	Actinopterygii	Protosphyraena	Tooth	1
V-3417	Marco Calcarenite	MC Ochre R	Actinopterygii	Xiphactinus	Tooth (complete crown)	1
V-3418	Marco Calcarenite	MC Ochre R	Actinopterygii		Urohyal	1
V-3437	Marco Calcarenite	MC Ochre R	Aves	Ichthyonis?	Bird Humerus (proximal end)	1
I-	Marco Calcarenite	MC Ochre R	Algae	Calcareous algae	Calcareous algae	4
V-3439	Marco Calcarenite	MC Ochre R	Reptilia		Turtle Femur	6
V-3440	Marco Calcarenite	MC Ochre R	Undet.		Coprolites	11
V-3445	Marco Calcarenite	MC Ochre R	Undet.		Fossils in Rocks in Water	20
V-3444	Marco Calcarenite	MC Ochre R	Undet.		Large Underterminate	>10
V-3443	Marco Calcarenite	MC Ochre R	Undet.		Medium Underterminate	4
V-3438	Marco Calcarenite	MC Ochre R	Aves	cf. Ichthyornis sp.	Possible Bird Limbs	2
V-3442	Marco Calcarenite	MC Ochre R	Undet.		Small Undeterminate	>10
V-3441	Marco Calcarenite	MC Ochre R	Undet.		Underterminate (All Sizes)	>10
V-3436	Marco Calcarenite	MC Ochre R	Chondrichthyes	Undet.	Very fine sediment	n.a.

## Sheet: Laurier LS
MM #	Horizon	Site	Phylum	Taxon	Element	Count	Notes
V-3446	Laurier Limestone beds	Edward's Creek	Actinopterygii		Basibranchial plates	15
V-3447	Laurier Limestone beds	Edward's Creek	Actinopterygii		Basipterygium	2
V-3448	Laurier Limestone beds	Edward's Creek	Actinopterygii		Brachiostegal rays	1
V-3449	Laurier Limestone beds	Edward's Creek	Actinopterygii	Apsopelix cf. anglicus	Caudal fin elements	15
V-3450	Laurier Limestone beds	Edward's Creek	Actinopterygii	cf. Pleuronectidae	Ceratobranchial	1
V-3451	Laurier Limestone beds	Edward's Creek	Actinopterygii		Cleithra	1
V-3452	Laurier Limestone beds	Edward's Creek	Actinopterygii		Coracoid	1
V-3453	Laurier Limestone beds	Edward's Creek	Actinopterygii		Dentary	1
V-3454	Laurier Limestone beds	Edward's Creek	Actinopterygii		Epihyal	1
V-3455	Laurier Limestone beds	Edward's Creek	Actinopterygii		Haemal spines	8
V-3456	Laurier Limestone beds	Edward's Creek	Actinopterygii		Hyomandibular	7
V-3457	Laurier Limestone beds	Edward's Creek	Actinopterygii		Hypohyal	1
V-3458	Laurier Limestone beds	Edward's Creek	Actinopterygii		Hypurals	>10
V-3459	Laurier Limestone beds	Edward's Creek	Actinopterygii	cf. Scorpaenidae	Maxilla	1
V-3460	Laurier Limestone beds	Edward's Creek	Actinopterygii		Mesethmoid	1
V-3461	Laurier Limestone beds	Edward's Creek	Actinopterygii		Mesopterygoid?	1
V-3462	Laurier Limestone beds	Edward's Creek	Actinopterygii		Opercle	3
V-3463	Laurier Limestone beds	Edward's Creek	Actinopterygii		Opisthotic?	1
V-3464	Laurier Limestone beds	Edward's Creek	Actinopterygii	Undet.	Palatine teeth?	2
V-3465	Laurier Limestone beds	Edward's Creek	Actinopterygii		Parasphenoid	1
V-3466	Laurier Limestone beds	Edward's Creek	Actinopterygii	cf. Ichthyodectes ctenodon	Pectoral fin elements	8
V-3467	Laurier Limestone beds	Edward's Creek	Actinopterygii		Premaxillae	6
V-3468	Laurier Limestone beds	Edward's Creek	Actinopterygii		Preopercles	2
V-3469	Laurier Limestone beds	Edward's Creek	Actinopterygii		Prootic	1
V-3470	Laurier Limestone beds	Edward's Creek	Actinopterygii		Quadrates type 1	5
V-3471	Laurier Limestone beds	Edward's Creek	Actinopterygii		Quadrates type 2	2
V-3472	Laurier Limestone beds	Edward's Creek	Actinopterygii		Ribs	12
V-3473	Laurier Limestone beds	Edward's Creek	Actinopterygii		Scales	>10
V-3474	Laurier Limestone beds	Edward's Creek	Actinopterygii		Scale in coprolite	1
V-3475	Laurier Limestone beds	Edward's Creek	Actinopterygii		Scapula	1
V-3476	Laurier Limestone beds	Edward's Creek	Actinopterygii		Subopercle	7
V-3477	Laurier Limestone beds	Edward's Creek	Actinopterygii		Supracleithrum	1
V-3478	Laurier Limestone beds	Edward's Creek	Actinopterygii		Supratemporal	1
V-3479	Laurier Limestone beds	Edward's Creek	Actinopterygii		Supraoccipital	1
V-3480	Laurier Limestone beds	Edward's Creek	Actinopterygii		Wishbone-shaped fossil	1
V-3481	Laurier Limestone beds	Edward's Creek	Actinopterygii		Partial atlas vertebrae	1
V-3482	Laurier Limestone beds	Edward's Creek	Actinopterygii		Complete small vertebrae	>10
V-3483	Laurier Limestone beds	Edward's Creek	Actinopterygii		Partial small vertebrae	>10
V-3484	Laurier Limestone beds	Edward's Creek	Actinopterygii		Complete medium vertebrae	>10
V-3485	Laurier Limestone beds	Edward's Creek	Actinopterygii		Partial medium vertebrae	>10
V-3486	Laurier Limestone beds	Edward's Creek	Actinopterygii		Partial large vertebrae	1
V-3487	Laurier Limestone beds	Edward's Creek	Actinopterygii		Distorted vertebrae	2
V-3488	Laurier Limestone beds	Edward's Creek	Actinopterygii		Atlas-1	21
V-3489	Laurier Limestone beds	Edward's Creek	Actinopterygii		SC-1 Complete small vertebrae	25
V-3490	Laurier Limestone beds	Edward's Creek	Actinopterygii		MC-1 Medium complete vertebrae	6
V-3491	Laurier Limestone beds	Edward's Creek	Actinopterygii		LC-1 Large complete vertebrae	3
V-3492	Laurier Limestone beds	Edward's Creek	Actinopterygii		LP-1 Large partial vertebrae	2
V-3493	Laurier Limestone beds	Edward's Creek	Chondrichthyes		Possible ray or skate teeth	4
V-3494	Laurier Limestone beds	Edward's Creek	Aves		Bird limb elements	4
V-3495	Laurier Limestone beds	Edward's Creek	Aves		Possible bird ribs	2
V-3496	Laurier Limestone beds	Edward's Creek	Reptilia		Turtle prox. femora	2
V-3497	Laurier Limestone beds	Edward's Creek	Undet.		Undeterminate small	>10
V-3498	Laurier Limestone beds	Edward's Creek	Undet.		Undeterminate medium	>10
V-3499	Laurier Limestone beds	Edward's Creek	Undet.		Undeterminate with distinguishable features	7
V-3500	Laurier Limestone beds	Edward's Creek	Undet.		Coprolites	20
V-3548	Laurier Limestone beds	Edward's Creek	Chondrichthyes	Vertebrate A	Partial tooth, distal end	1	Fig. 4G of Kilmury et al. (2022)
V-3559	Laurier Limestone beds	Edward's Creek	Actinopterygii	Pachrhizodus minimus	Tooth	1	Fig. 6A of Kilmury et al. (2022)
V-3560	Laurier Limestone beds	Edward's Creek	Actinopterygii	Enchodus petrosus	Palatine tooth	1	Fig. 6B of Kilmury et al. (2022)
V-3561	Laurier Limestone beds	Edward's Creek	Actinopterygii	Undet.	Palatine tooth	1	Fig. 6D of Kilmury et al. (2022)
V-3562	Laurier Limestone beds	Edward's Creek	Actinopterygii		Premaxilla	1	Fig. 6E of Kilmury et al. (2022)
V-3563	Laurier Limestone beds	Edward's Creek	Actinopterygii	Albulidae incertae sedis	Tooth plate	1	Fig. 6C of Kilmury et al. (2022)
V-3564	Laurier Limestone beds	Edward's Creek	Actinopterygii		Prefrontal	1	Fig. 7A of Kilmury et al. (2022)
V-3565	Laurier Limestone beds	Edward's Creek	Actinopterygii		Otolith	1	Fig. 7B of Kilmury et al. (2022)
V-3566	Laurier Limestone beds	Edward's Creek	Actinopterygii		Posttemporal	1	Fig. 7C of Kilmury et al. (2022)
V-3567	Laurier Limestone beds	Edward's Creek	Actinopterygii		Scapula	1	Fig. 7D of Kilmury et al. (2022)
V-3568	Laurier Limestone beds	Edward's Creek	Actinopterygii	Apsopelix cf. anglicus	Caudal fin element	1	Fig. 7E of Kilmury et al. (2022)
V-3569	Laurier Limestone beds	Edward's Creek	Actinopterygii	Apsopelix cf. anglicus	Caudal fin element	1	Fig. 7F of Kilmury et al. (2022)
V-3570	Laurier Limestone beds	Edward's Creek	Actinopterygii	Apsopelix cf. anglicus	Caudal fin element	1	Fig. 7G of Kilmury et al. (2022)
V-3571	Laurier Limestone beds	Edward's Creek	Reptilia		Turtle prox. femur	1	Fig. 8A of Kilmury et al. (2022)
V-3572	Laurier Limestone beds	Edward's Creek	Reptilia		Turtle prox. femur	1	Fig. 8B of Kilmury et al. (2022)
V-3573	Laurier Limestone beds	Edward's Creek	Aves	Ichthyornis?	Possible bird rib	1	Fig. 8C of Kilmury et al. (2022)
V-3574	Laurier Limestone beds	Edward's Creek	Aves	Ichthyornis?	Partial proximal femur	1	Fig. 8D of Kilmury et al. (2022)

## Sheet: Near Keld Base
MM #	Horizon	Site	Phylum	Taxon	Element	Count	Notes
V-3549	Near Keld base	Vermilion R	Actinopterygii	c.f. Apateodus	Partial tooth crown (imaged & figured)	1	Fig. 5A of Kilmury et al. (2022)
V-3550	Near Keld base	Vermilion R	Actinopterygii	c.f. Plethodidae	Partial tooth crown	1	Fig. 5B of Kilmury et al. (2022)
V-3551	Near Keld base	Vermilion R	Actinopterygii	Caturidae undet.	Partial tooth crown	1	Fig. 5C of Kilmury et al. (2022)
V-3552	Near Keld base	Vermilion R	Actinopterygii		Dentary	1	Fig. 5D of Kilmury et al. (2022)
V-3553	Near Keld base	Vermilion R	Actinopterygii	Micropycnodon kansensis	Retroarticular?	1	Fig. 5E of Kilmury et al. (2022)
V-3554	Near Keld base	Vermilion R	Actinopterygii	c.f. Pleuronectidae	Ceratobrachial	1	Fig. 5F of Kilmury et al. (2022)
V-3555	Near Keld base	Vermilion R	Actinopterygii		Premaxilla	1	Fig. 5G of Kilmury et al. (2022)
V-3556	Near Keld base	Vermilion R	Actinopterygii		Jaw fragment	1	Fig. 5H of Kilmury et al. (2022)
V-3557	Near Keld base	Vermilion R	Aves		Bird Femur?	1	Fig. 5I of Kilmury et al. (2022)
V-3558	Near Keld base	Vermilion R	Actinopterygii	Apsopelix anglicus?	Apsopelix Caudal	1	Fig. 5J of Kilmury et al. (2022)
V-3543	Near Keld base	Vermilion R	Chondrichthyes	Squalicorax curvatus	Tooth (complete)	1	In small plastic case
V-3501	Near Keld base	Vermilion R	Actinopterygii		Basioccipital	1
V-3502	Near Keld base	Vermilion R	Actinopterygii		Basipterygium	1
V-3503	Near Keld base	Vermilion R	Actinopterygii		Branchiostegal ray fragment	1
V-3504	Near Keld base	Vermilion R	Actinopterygii		Ceratohyal	1
V-3505	Near Keld base	Vermilion R	Actinopterygii		Cleithrum	1
V-3535	Near Keld base	Vermilion R	Actinopterygii		Complete small vertebrae	2
V-3506	Near Keld base	Vermilion R	Actinopterygii		Coracoid	1
V-3534	Near Keld base	Vermilion R	Actinopterygii		Distorted vertebrae	3
V-3533	Near Keld base	Vermilion R	Actinopterygii		Embedded vertebrae in water	4
V-3507	Near Keld base	Vermilion R	Actinopterygii		Epihyal	1
V-3508	Near Keld base	Vermilion R	Actinopterygii		Epurals	2
V-3509	Near Keld base	Vermilion R	Actinopterygii		Exoccipital?	1
V-3510	Near Keld base	Vermilion R	Actinopterygii		Frontal	1
V-3511	Near Keld base	Vermilion R	Actinopterygii		Haemal spines	3
V-3512	Near Keld base	Vermilion R	Actinopterygii		Hyomandibular	1
V-3513	Near Keld base	Vermilion R	Actinopterygii		Interhyal	1
V-3514	Near Keld base	Vermilion R	Actinopterygii		Nasal	1
V-3515	Near Keld base	Vermilion R	Actinopterygii		Opisthotic?	1
V-3516	Near Keld base	Vermilion R	Actinopterygii		Otolith	1
V-3517	Near Keld base	Vermilion R	Actinopterygii		Parasphenoid fragment	1
V-3536	Near Keld base	Vermilion R	Actinopterygii		Partial medium vertebrae	16
V-3530	Near Keld base	Vermilion R	Actinopterygii	c.f. Apateodus	Tooth crown (partial)	1
V-3518	Near Keld base	Vermilion R	Actinopterygii		Phyrangobranchial	2
V-3519	Near Keld base	Vermilion R	Actinopterygii		Possible frontal	1
V-3520	Near Keld base	Vermilion R	Actinopterygii		Pterotic?	1
V-3521	Near Keld base	Vermilion R	Actinopterygii		Quadrate	1
V-3522	Near Keld base	Vermilion R	Actinopterygii		Radial	1
V-3523	Near Keld base	Vermilion R	Actinopterygii		Ribs	14
V-3524	Near Keld base	Vermilion R	Actinopterygii		Scales	12
V-3525	Near Keld base	Vermilion R	Actinopterygii		Scapula	1
V-3526	Near Keld base	Vermilion R	Actinopterygii		Small Rectangles	5
V-3532	Near Keld base	Vermilion R	Actinopterygii		Small teeth in water?	2
V-3527	Near Keld base	Vermilion R	Actinopterygii		Supracleithrum	1
V-3528	Near Keld base	Vermilion R	Actinopterygii		Symplectic	1
V-3529	Near Keld base	Vermilion R	Actinopterygii		Terminal rib pieces?	7
V-3531	Near Keld base	Vermilion R	Actinopterygii	Protosphyraena sp.	Tooth crown (large)	1
V-3537	Near Keld base	Vermilion R	Undet.		Coprolites	1
V-3538	Near Keld base	Vermilion R	Undet.		Indet. fossils embedded in rock, in water	>10
V-3539	Near Keld base	Vermilion R	Undet.		Indeterminate	23
V-3540	Near Keld base	Vermilion R	Undet.		Interesting textures	3
V-3541	Near Keld base	Vermilion R	Undet.		Small undeterminate	7
V-3542	Near Keld base	Vermilion R	Undet.		Undeterminate with distinguishing features	5
