# Supplementary material for: Microvertebrate faunal assemblages of the Favel Formation (late Cenomanian-middle Turonian) of Manitoba, Canada
Source: PeerJ. 2023 Aug 3;11:e15493. doi: 10.7717/peerj.15493 (PMC10404398; doi:10.7717/peerj.15493)
Supplement: Supplemental Information 10 [file peerj-11-15493-s010.xlsx]

## Sheet: Sheet1
Horizon & Locality	Vial or Tray #	Colour	Conical Depth (mm)	Height (mm)	Diameter (mm)	Radial Diameter (mm)	Lateral Width (mm)	Height/ Diameter Ratio	RD/H	Radius (axial)	Radius (lateral)	Centrum Area (mm²)	Notes
MC_OchreR		Dark Brown	#N/A	1.92	2.1	0.34	1.59	0.914286	0.177083	0.96	1.05	3.16673
MC_OchreR		Dark Brown	#N/A	0.82	1.2	0.6	0.42	0.683333	0.731707	0.41	0.6	0.772832
MC_OchreR		Dark Brown	#N/A	1.05	1.05	0.49	1.42	1	0.466667	0.525	0.525	0.865901
MC_OchreR		Dark Brown	#N/A	1.6	1.6	0.58	1.6	1	0.3625	0.8	0.8	2.01062
MC_OchreR		Dark Brown	#N/A	1.47	1.6	0.5	1.52	0.91875	0.340136	0.735	0.8	1.84726
MC_OchreR		Dark Brown	#N/A	1.22	1.2	0.56	1.13	1.01667	0.459016	0.61	0.6	1.14982
MC_OchreR		Dark Brown	#N/A	1.27	1.48	0.61	0.99	0.858108	0.480315	0.635	0.74	1.47623
MC_OchreR		Dark Brown	#N/A	1.59	1.45	0.59	1.45	1.09655	0.371069	0.795	0.725	1.81074
MC_OchreR		Translucent	#N/A	1.16	1.06	0.38	1.35	1.09434	0.327586	0.58	0.53	0.965726
MC_OchreR		Translucent	0.8	#N/A	1.09	0.37	1.53			#N/A	0.545	#N/A
MC_OchreR		Dark Brown	0.62	1.69	1.51	0.69	#N/A	1.11921	0.408284	0.845	0.755	2.00426
MC_OchreR		Dark Brown	#N/A	1.83	2.24	0.73	1.94	0.816964	0.398907	0.915	1.12	3.2195
MC_OchreR		Translucent	0.7	0.94	0.96	0.49	1.39	0.979167	0.521277	0.47	0.48	0.708743
MC_OchreR		Light Brown	#N/A	0.87	0.87	0.37	1.5	1	0.425287	0.435	0.435	0.594468
MC_OchreR		Dark Brown	#N/A	1.18	1.27	#N/A	0.91	0.929134	#N/A	0.59	0.635	1.177
MC_OchreR		Dark Brown	#N/A	0.87	0.87	0.25	0.89	1	0.287356	0.435	0.435	0.594468
MC_OchreR		Dark Brown	#N/A	1.43	1.49	0.58	1.6	0.959732	0.405594	0.715	0.745	1.67345
MC_OchreR		Dark Brown	#N/A	0.96	1.27	0.43	1.19	0.755906	0.447917	0.48	0.635	0.957557
MC_OchreR		Translucent	#N/A	0.87	0.79	0.35	1.23	1.10127	0.402299	0.435	0.395	0.539804
MC_OchreR		Dark Brown	#N/A	1.34	1.33	0.46	1.56	1.00752	0.343284	0.67	0.665	1.39974
MC_OchreR		Translucent	#N/A	1.16	1.14	0.42	1.73	1.01754	0.362069	0.58	0.57	1.03861
MC_OchreR		Dark Brown	#N/A	1.28	1.1	0.32	1.09	1.16364	0.25	0.64	0.55	1.10584
MC_OchreR		Light Brown	1.28	#N/A	#N/A	1.27	2.94			#N/A	#N/A	#N/A
MC_OchreR		Light Brown	0.97	1.78	1.73	0.61	2.16	1.0289	0.342697	0.89	0.865	2.41856
MC_OchreR		Dark Brown	2.48	3.18	2.66	1.09	3.76	1.19549	0.342767	1.59	1.33	6.64353
MC_OchreR		Dark Brown	#N/A	0.99	1.07	0.34	1.07	0.925234	0.343434	0.495	0.535	0.831972
MC_OchreR		Dark Brown	#N/A	#N/A	1.88	0.93	2.18			#N/A	0.94	#N/A
MC_OchreR		Dark Brown	0.61	1.56	1.92	0.7	1.6	0.8125	0.448718	0.78	0.96	2.35242
MC_OchreR		Dark Brown	#N/A	1.56	1.62	0.48	1.84	0.962963	0.307692	0.78	0.81	1.98486
MC_OchreR		Dark Brown	#N/A	1.43	1.84	0.79	1.4	0.777174	0.552448	0.715	0.92	2.06654
MC_OchreR		Light Brown	#N/A	0.76	0.94	0.44	0.98	0.808511	0.578947	0.38	0.47	0.561088
MC_OchreR		Light Brown	#N/A	1.27	1.19	0.63	1.69	1.06723	0.496063	0.635	0.595	1.18697
MC_OchreR		Light Brown	#N/A	0.95	0.96	0.32	1.55	0.989583	0.336842	0.475	0.48	0.716283
MC_OchreR		Light Brown	#N/A	0.91	0.81	0.46	1.42	1.12346	0.505495	0.455	0.405	0.578917
MC_OchreR		Light Brown	#N/A	0.98	0.94	0.44	1.48	1.04255	0.44898	0.49	0.47	0.723509
MC_OchreR		Dark Brown	#N/A	0.73	0.74	0.3	0.85	0.986486	0.410959	0.365	0.37	0.424272
MC_OchreR		Light Brown	#N/A	0.7	0.6	0.3	1.13	1.16667	0.428571	0.35	0.3	0.329867
MC_OchreR		Translucent	0.46	0.72	0.68	0.25	0.77	1.05882	0.347222	0.36	0.34	0.384531
MC_OchreR		Translucent	#N/A	1.14	1.14	0.5	1.7	1	0.438596	0.57	0.57	1.0207
MC_OchreR		Light Brown	#N/A	1.8	1.41	0.39	1.97	1.2766	0.216667	0.9	0.705	1.99334
MC_OchreR		Black	#N/A	1.78	1.85	0.72	2.35	0.962162	0.404494	0.89	0.925	2.58632
MC_OchreR		Black	0.32	0.84	0.83	0.41	#N/A	1.01205	0.488095	0.42	0.415	0.54758
MC_OchreR		Dark Brown	#N/A	2.04	1.82	0.69	2.45	1.12088	0.338235	1.02	0.91	2.91603
MC_OchreR		Dark Brown	0.88	#N/A	2.1	0.59	#N/A			#N/A	1.05	#N/A
MC_OchreR		Translucent	#N/A	1.13	1.21	0.59	1.5	0.933884	0.522124	0.565	0.605	1.07387
MC_OchreR		Dark Brown	#N/A	1.38	1.28	0.41	1.26	1.07812	0.297101	0.69	0.64	1.38733
MC_OchreR		Dark Brown	0.73	1.63	1.96	0.86	1.6	0.831633	0.527607	0.815	0.98	2.50919
MC_OchreR		Translucent	#N/A	0.92	1	0.25	1.03	0.92	0.271739	0.46	0.5	0.722566
MC_OchreR		Translucent	#N/A	1.01	0.84	0.35	1.28	1.20238	0.346535	0.505	0.42	0.666332
MC_OchreR		Dark Brown	#N/A	1.2	1.2	0.43	1.58	1	0.358333	0.6	0.6	1.13097
MC_OchreR		Dark Brown	#N/A	1.1	1.31	0.44	1.24	0.839695	0.4	0.55	0.655	1.13176
MC_OchreR		Translucent	#N/A	0.58	0.57	0.28	0.74	1.01754	0.482759	0.29	0.285	0.259653
MC_OchreR		Dark Brown	#N/A	1.25	1.5	0.35	1	0.833333	0.28	0.625	0.75	1.47262
MC_OchreR		Dark Brown	#N/A	1.62	1.56	0.54	2.12	1.03846	0.333333	0.81	0.78	1.98486
MC_OchreR		Dark Brown	0.38	0.72	0.87	0.4	1.28	0.827586	0.555556	0.36	0.435	0.491973
MC_OchreR		Dark Brown	#N/A	1.09	0.82	0.45	1.56	1.32927	0.412844	0.545	0.41	0.701989
MC_OchreR		Translucent	0.39	0.57	0.82	0.3	0.85	0.695122	0.526316	0.285	0.41	0.367095
MC_OchreR		Translucent	#N/A	0.61	0.45	0.17	0.8	1.35556	0.278689	0.305	0.225	0.215592
MC_OchreR		Translucent	#N/A	0.55	0.38	0.15	0.75	1.44737	0.272727	0.275	0.19	0.164148
MC_OchreR		Dark Brown	0.36	0.85	0.94	0.29	0.96	0.904255	0.341176	0.425	0.47	0.627533
MC_OchreR		Dark Brown	#N/A	1.62	1.52	0.67	0.73	1.06579	0.41358	0.81	0.76	1.93396
MC_OchreR		Translucent	#N/A	0.79	0.97	0.21	0.84	0.814433	0.265823	0.395	0.485	0.601851
MC_OchreR		Dark Brown	#N/A	1.42	2.01	0.77	2.09	0.706468	0.542254	0.71	1.005	2.24168
MC_OchreR		Light Brown	#N/A	0.6	0.88	0.36	0.9	0.681818	0.6	0.3	0.44	0.41469
MC_OchreR		Dark Brown	#N/A	1.25	1.33	0.43	1.1	0.93985	0.344	0.625	0.665	1.30572
MC_OchreR		Dark Brown	0.65	1	1.02	0.34	1.44	0.980392	0.34	0.5	0.51	0.801106
MC_OchreR		Translucent	0.45	0.84	0.85	0.37	0.9	0.988235	0.440476	0.42	0.425	0.560774
MC_OchreR		Dark Brown	0.64	1.28	1.44	0.4	1.86	0.888889	0.3125	0.64	0.72	1.44765
MC_OchreR		Translucent	#N/A	1.09	1.52	0.7	1.46	0.717105	0.642202	0.545	0.76	1.30125
MC_OchreR		Light Brown	0.54	1.01	0.9	0.32	1.24	1.12222	0.316832	0.505	0.45	0.713927
MC_OchreR		Light Brown	0.41	0.57	0.65	0.3	0.9	0.876923	0.526316	0.285	0.325	0.29099
MC_OchreR		Light Brown	#N/A	0.69	0.65	0.1	0.67	1.06154	0.144928	0.345	0.325	0.352251
MC_OchreR		Dark Brown	#N/A	1.09	0.58	0.3	1.59	1.87931	0.275229	0.545	0.29	0.496529
MC_OchreR		Dark Brown	0.78	1.66	1.3	0.65	1.73	1.27692	0.391566	0.83	0.65	1.69489
MC_OchreR		Translucent	#N/A	1.04	0.92	0.24	0.95	1.13043	0.230769	0.52	0.46	0.751469
MC_OchreR		Dark Brown	0.25	1.15	1.15	0.25	0.89	1	0.217391	0.575	0.575	1.03869
MC_OchreR		Light Brown	#N/A	0.87	0.94	0.39	1.34	0.925532	0.448276	0.435	0.47	0.642299
MC_OchreR		Translucent	0.5	0.87	1.09	0.39	1.36	0.798165	0.448276	0.435	0.545	0.744793
MC_OchreR		Translucent	0.77	1.29	1.39	0.58	1.71	0.928058	0.449612	0.645	0.695	1.4083
MC_OchreR		Dark Brown	0.57	1.54	1.54	0.4	1.11	1	0.25974	0.77	0.77	1.86265
MC_OchreR		Dark Brown	0.51	#N/A	1.44	0.45	1.6			#N/A	0.72	#N/A
MC_OchreR		Dark Brown	0.42	#N/A	1.22	0.35	1.6			#N/A	0.61	#N/A
MC_OchreR		Dark Brown	#N/A	1.16	1.41	0.4	1.43	0.822695	0.344828	0.58	0.705	1.2846
MC_OchreR		Dark Brown	#N/A	0.91	0.65	0.22	0.83	1.4	0.241758	0.455	0.325	0.464563
MC_OchreR		Dark Brown	#N/A	0.47	0.33	0.22	0.6	1.42424	0.468085	0.235	0.165	0.121815
MC_OchreR		Light Brown	#N/A	1.04	0.93	0.33	1.38	1.11828	0.317308	0.52	0.465	0.759637
MC_OchreR		Light Brown	0.39	0.98	#N/A	#N/A	1.08			0.49	#N/A	#N/A
MC_OchreR		Dark Brown	0.81	1.33	0.98	0.39	1.69	1.35714	0.293233	0.665	0.49	1.02369
MC_OchreR		Light Brown	0.92	1.35	1.27	0.72	1.84	1.06299	0.533333	0.675	0.635	1.34657
MC_OchreR		Light Brown	#N/A	1.28	1.29	0.34	#N/A	0.992248	0.265625	0.64	0.645	1.29685
MC_OchreR		Light Brown	#N/A	0.54	0.55	0.17	#N/A	0.981818	0.314815	0.27	0.275	0.233263
MC_OchreR		Light Brown	1.62	4.11	3.81	1.7	3.92	1.07874	0.413625	2.055	1.905	12.2986
MC_OchreR		Dark Brown	0.66	1.18	1.39	0.58	1.6	0.848921	0.491525	0.59	0.695	1.28821
MC_OchreR		Dark Brown	#N/A	1.68	1.74	0.72	1.55	0.965517	0.428571	0.84	0.87	2.29588
MC_OchreR		Light Brown	0.59	1.15	1.15	0.49	1.66	1	0.426087	0.575	0.575	1.03869
MC_OchreR		Dark Brown	#N/A	1.4	1.39	0.62	0.66	1.00719	0.442857	0.7	0.695	1.52838
MC_OchreR		Dark Brown	#N/A	1.5	1.76	0.77	#N/A	0.852273	0.513333	0.75	0.88	2.07345
MC_OchreR		Dark Brown	0.59	#N/A	0.93	#N/A	#N/A	#N/A	#N/A	#N/A	0.465	#N/A
MC_OchreR		Light Brown	0.37	#N/A	1.1	0.27	1.26	#N/A	#N/A	#N/A	0.55	#N/A
MC_OchreR		Dark Brown	0.85	#N/A	1.95	0.86	2.16	#N/A	#N/A	#N/A	0.975	#N/A
MC_OchreR		Light Brown	1.3	2.02	2.22	0.96	2.6	0.90991	0.475248	1.01	1.11	3.52204
MC_OchreR		Translucent	#N/A	0.66	0.67	0.18	0.65	0.985075	0.272727	0.33	0.335	0.347303
MC_OchreR		Light Brown	0.53	1.18	1.17	0.44	1.36	1.00855	0.372881	0.59	0.585	1.08432
MC_OchreR		Dark Brown	1.26	2.57	2.55	1.17	#N/A	1.00784	0.455253	1.285	1.275	5.14711
MC_OchreR		Light Brown	0.99	1.25	1.52	0.74	#N/A	0.822368	0.592	0.625	0.76	1.49226
MC_OchreR		Dark Brown	#N/A	0.77	1	0.23	0.88	0.77	0.298701	0.385	0.5	0.604757
MC_OchreR		Dark Brown	#N/A	0.89	1.13	0.57	1.31	0.787611	0.640449	0.445	0.565	0.789875
MC_OchreR		Dark Brown	0.6	1.35	1.3	0.43	1.66	1.03846	0.318519	0.675	0.65	1.37837
MC_OchreR		Dark Brown	0.61	1.17	1.17	0.48	1.62	1	0.410256	0.585	0.585	1.07513
MC_OchreR		Light Brown	0.66	1.18	1.42	0.49	1.46	0.830986	0.415254	0.59	0.71	1.31601
MC_OchreR		Translucent	0.46	0.82	0.65	0.29	1.06	1.26154	0.353659	0.41	0.325	0.418617
MC_OchreR		Dark Brown	0.72	1.49	#N/A	0.58	1.74	#N/A	0.389262	0.745	#N/A	#N/A
MC_OchreR		Light Brown	0.69	1.02	#N/A	0.47	1.61	#N/A	0.460784	0.51	#N/A	#N/A
MC_OchreR		Dark Brown	0.51	0.89	0.97	0.44	1.36	0.917526	0.494382	0.445	0.485	0.678034
MC_OchreR		Dark Brown	#N/A	1.55	1.4	0.36	1.44	1.10714	0.232258	0.775	0.7	1.70431
MC_OchreR		Light Brown	0.55	0.85	#N/A	0.41	#N/A	#N/A	0.482353	0.425	#N/A	#N/A
MC_OchreR		Dark Brown	0.65	1.08	0.85	0.35	1.4	1.27059	0.324074	0.54	0.425	0.720996
MC_OchreR		Dark Brown	#N/A	1.6	1.75	0.76	1.77	0.914286	0.475	0.8	0.875	2.19911
MC_OchreR		Dark Brown	0.74	1.88	1.51	0.55	#N/A	1.24503	0.292553	0.94	0.755	2.22959
MC_OchreR		Black	#N/A	1.37	1.18	0.47	1.99	1.16102	0.343066	0.685	0.59	1.26967
MC_OchreR		Dark Brown	0.45	0.85	0.83	0.32	1.39	1.0241	0.376471	0.425	0.415	0.554098
MC_OchreR		Translucent	0.8	#N/A	1.15	0.5	1.41	#N/A	#N/A	#N/A	0.575	#N/A
MC_OchreR		Dark Brown	0.55	0.95	0.95	0.39	1.35	1	0.410526	0.475	0.475	0.708822
MC_OchreR		Translucent	0.42	0.5	0.56	0.21	0.91	0.892857	0.42	0.25	0.28	0.219911
MC_OchreR		Dark Brown	0.57	1.19	1.47	0.46	#N/A	0.809524	0.386555	0.595	0.735	1.3739
MC_OchreR		Dark Brown	0.59	0.97	0.97	0.45	1.31	1	0.463918	0.485	0.485	0.738981
MC_OchreR		Dark Brown	#N/A	1.39	2.04	#N/A	2.22	0.681373	#N/A	0.695	1.02	2.22708
MC_OchreR		Dark Brown	0.57	0.96	1.11	0.4	1.16	0.864865	0.416667	0.48	0.555	0.83692
MC_OchreR		Translucent	0.46	0.95	0.99	0.42	1.44	0.959596	0.442105	0.475	0.495	0.738667
MC_OchreR		Dark Brown	#N/A	1.17	0.98	0.4	1.76	1.19388	0.34188	0.585	0.49	0.900538
MC_OchreR		Dark Brown	0.94	1.59	1.5	#N/A	1.94	1.06	#N/A	0.795	0.75	1.87317
MC_OchreR		Black	0.68	1.42	1.92	0.7	1.96	0.739583	0.492958	0.71	0.96	2.14131
MC_OchreR		Dark Brown	0.93	1.99	2.2	0.77	2.56	0.904545	0.386935	0.995	1.1	3.43847
MC_OchreR		Dark Brown	0.68	1.57	2.01	0.61	1.8	0.781095	0.388535	0.785	1.005	2.47848
MC_OchreR		Light Brown	0.82	2.15	2.3	1.01	1.92	0.934783	0.469767	1.075	1.15	3.88379
MC_OchreR		Dark Brown	1.05	1.6	1.69	0.77	2.12	0.946746	0.48125	0.8	0.845	2.12372
MC_OchreR		Translucent	0.6	1.34	1.18	0.5	1.77	1.13559	0.373134	0.67	0.59	1.24187
MC_OchreR		Translucent	#N/A	1.09	0.96	0.4	1.53	1.13542	0.366972	0.545	0.48	0.821841
MC_OchreR		Dark Brown	0.85	1.45	1.28	#N/A	1.82	1.13281	#N/A	0.725	0.64	1.4577
MC_OchreR		Dark Brown	#N/A	1.37	1.36	0.65	1.79	1.00735	0.474453	0.685	0.68	1.46335
MC_OchreR		Black	0.56	1.43	1.74	0.71	1.12	0.821839	0.496503	0.715	0.87	1.95423
MC_OchreR		Dark Brown	1.06	2.34	2.36	1.24	2.6	0.991525	0.529915	1.17	1.18	4.33728
MC_OchreR		Dark Brown	0.61	1.2	1.44	0.52	1.67	0.833333	0.433333	0.6	0.72	1.35717
MC_OchreR		Dark Brown	0.71	#N/A	1.91	0.85	1.67		#N/A	#N/A	0.955	#N/A
MC_OchreR		Dark Brown	1.06	1.87	2.44	0.86	#N/A	0.766393	0.459893	0.935	1.22	3.58361
MC_OchreR		Light Brown	#N/A	1.1	1.04	0.35	1.42	1.05769	0.318182	0.55	0.52	0.898495
MC_OchreR		Dark Brown	1.16	2.51	2.53	0.98	2.92	0.992095	0.390438	1.255	1.265	4.98751
MC_OchreR		Dark Brown	#N/A	5.9	6.08	2.52	#N/A	0.970395	0.427119	2.95	3.04	28.1738
MC_OchreR		Dark Brown	0.55	1.15	1.56	0.55	1.41	0.737179	0.478261	0.575	0.78	1.409
MC_OchreR		Dark Brown	#N/A	1.01	1.06	0.48	1.57	0.95283	0.475248	0.505	0.53	0.840847
MC_OchreR		Dark Brown	#N/A	1.48	1.68	0.8	1.88	0.880952	0.540541	0.74	0.84	1.95281
MC_OchreR		Dark Brown	#N/A	1.36	1.55	0.5	1.9	0.877419	0.367647	0.68	0.775	1.65562
MC_OchreR		Black	1	2.02	#N/A	0.75	2.22	#N/A	0.371287	1.01	#N/A	#N/A
MC_OchreR		Dark Brown	0.81	1.95	1.71	0.76	#N/A	1.14035	0.389744	0.975	0.855	2.61891
MC_OchreR		Dark Brown	#N/A	1.3	2.38	1.1	#N/A	0.546218	0.846154	0.65	1.19	2.43002
MC_OchreR		Dark Brown	#N/A	1.26	1.17	0.46	0.84	1.07692	0.365079	0.63	0.585	1.15783
MC_OchreR		Translucent	0.63	0.98	0.91	0.47	1.23	1.07692	0.479592	0.49	0.455	0.700418
MC_OchreR		Dark Brown	#N/A	1.04	1.29	0.5	1.65	0.806202	0.480769	0.52	0.645	1.05369
MC_OchreR		Translucent	0.52	1.33	1.42	0.64	1.25	0.93662	0.481203	0.665	0.71	1.4833
MC_OchreR		Light Brown	1.44	2.2	2.32	0.99	2.88	0.948276	0.45	1.1	1.16	4.00867
MC_OchreR		Translucent	0.56	0.99	0.96	0.39	1.27	1.03125	0.393939	0.495	0.48	0.746442
MC_OchreR		Dark Brown	1.36	2.45	2.43	1.3	#N/A	1.00823	0.530612	1.225	1.215	4.67587
MC_OchreR		Light Brown	0.82	1.49	1.33	0.6	1.85	1.1203	0.402685	0.745	0.665	1.55642
MC_OchreR		Black	#N/A	1.91	2.06	0.57	0.88	0.927184	0.298429	0.955	1.03	3.09023
MC_OchreR		Black	#N/A	2.33	2.71	1.12	2.47	0.859779	0.480687	1.165	1.355	4.95924
MC_OchreR		Translucent	0.59	1.3	1.49	0.46	#N/A	0.872483	0.353846	0.65	0.745	1.52132
MC_OchreR		Translucent	0.43	0.67	0.77	0.21	1.12	0.87013	0.313433	0.335	0.385	0.405187
MC_OchreR		Light Brown	0.41	0.91	1.1	0.48	1.45	0.827273	0.527473	0.455	0.55	0.786184
MC_OchreR		Dark Brown	#N/A	1.2	1	0.42	0.68	1.2	0.35	0.6	0.5	0.942478
MC_OchreR		Dark Brown	#N/A	0.89	0.82	0.33	0.82	1.08537	0.370787	0.445	0.41	0.573184
MC_OchreR		Dark Brown	#N/A	1.28	1.08	0.46	1.03	1.18519	0.359375	0.64	0.54	1.08573
MC_OchreR		Translucent	0.61	1.04	1.41	0.51	#N/A	0.737589	0.490385	0.52	0.705	1.15171
MC_OchreR		Light Brown	0.64	1.15	1.07	0.4	1.53	1.07477	0.347826	0.575	0.535	0.966432
MC_OchreR		Dark Brown	1.1	1.24	1.28	0.74	#N/A	0.96875	0.596774	0.62	0.64	1.24658
MC_OchreR		Light Brown	#N/A	2.05	2.3	0.96	1.5	0.891304	0.468293	1.025	1.15	3.70315
MC_OchreR		Dark Brown	#N/A	1.12	1.85	0.65	1.77	0.605405	0.580357	0.56	0.925	1.62734
MC_OchreR		Dark Brown	0.48	1.02	1.28	0.42	1.32	0.796875	0.411765	0.51	0.64	1.02542
MC_OchreR		Light Brown	0.63	1.38	1.79	0.69	1.26	0.77095	0.5	0.69	0.895	1.94009
MC_OchreR		Dark Brown	0.69	1.07	1.28	0.41	1.31	0.835938	0.383178	0.535	0.64	1.07568
MC_OchreR		Translucent	0.66	1.02	0.96	0.32	1.52	1.0625	0.313725	0.51	0.48	0.769062
MC_OchreR		Dark Brown	0.72	#N/A	#N/A	#N/A	1.72	#N/A	#N/A	#N/A	#N/A	#N/A
MC_OchreR		Light Brown	0.42	0.75	0.86	0.36	#N/A	0.872093	0.48	0.375	0.43	0.506582
MC_OchreR		Dark Brown	0.5	1.01	1.21	0.48	1.25	0.834711	0.475248	0.505	0.605	0.959835
MC_OchreR		Translucent	0.59	1.05	1.11	0.47	1.58	0.945946	0.447619	0.525	0.555	0.915382
MC_OchreR		Light Brown	0.69	1.13	1.08	0.42	1.42	1.0463	0.371681	0.565	0.54	0.9585
MC_OchreR		Dark Brown	0.54	0.96	0.95	0.41	1.28	1.01053	0.427083	0.48	0.475	0.716283
MC_OchreR		Dark Brown	1.49	2.47	2.62	1.18	3.51	0.942748	0.477733	1.235	1.31	5.08263
MC_OchreR		Dark Brown	0.75	1.18	1.23	0.46	1.72	0.95935	0.389831	0.59	0.615	1.13993
MC_OchreR		Dark Brown	#N/A	2.06	2.06	0.65	#N/A	1	0.315534	1.03	1.03	3.33292
MC_OchreR		Light Brown	#N/A	1.04	0.94	0.35	1.05	1.10638	0.336538	0.52	0.47	0.767805
MC_OchreR		Light Brown	0.61	1.2	1.32	0.47	1.86	0.909091	0.391667	0.6	0.66	1.24407
MC_OchreR		Translucent	0.66	0.83	0.77	0.38	1.38	1.07792	0.457831	0.415	0.385	0.501948
MC_OchreR		Dark Brown	0.61	0.99	0.89	0.47	1.47	1.11236	0.474747	0.495	0.445	0.692014
MC_OchreR		Dark Brown	0.71	0.96	1.03	0.44	1.42	0.932039	0.458333	0.48	0.515	0.776602
MC_OchreR		Dark Brown	#N/A	0.96	1.07	0.36	0.87	0.897196	0.375	0.48	0.535	0.806761
MC_OchreR		Dark Brown	#N/A	1.29	1.5	0.68	1.74	0.86	0.527132	0.645	0.75	1.51975
MC_OchreR		Dark Brown	#N/A	1.02	1.11	0.42	1.2	0.918919	0.411765	0.51	0.555	0.889228
MC_OchreR		Translucent	0.53	1.08	1.04	0.38	1.48	1.03846	0.351852	0.54	0.52	0.882159
MC_OchreR		Black	#N/A	1.29	1.45	0.63	1.12	0.889655	0.488372	0.645	0.725	1.46909
MC_OchreR		Translucent	0.5	1.11	1.09	0.41	1.35	1.01835	0.369369	0.555	0.545	0.950253
MC_OchreR		Translucent	0.53	0.92	0.9	0.33	1.28	1.02222	0.358696	0.46	0.45	0.65031
MC_OchreR		Light Brown	0.42	0.99	0.76	0.36	0.95	1.30263	0.363636	0.495	0.38	0.590934
MC_OchreR		Light Brown	0.56	1.08	#N/A	0.56	1.42	#N/A	0.518519	0.54	#N/A	#N/A
MC_OchreR		Light Brown	0.49	0.94	0.95	0.48	1.12	0.989474	0.510638	0.47	0.475	0.701361
MC_OchreR		Dark Brown	#N/A	1.07	0.87	0.49	1.16	1.22989	0.457944	0.535	0.435	0.731127
MC_OchreR		Dark Brown	0.6	0.75	0.78	0.42	#N/A	0.961538	0.56	0.375	0.39	0.459458
MC_OchreR		Dark Brown	0.49	1.35	1.35	0.51	1.17	1	0.377778	0.675	0.675	1.43139
MC_OchreR		Dark Brown	0.53	0.9	0.94	0.43	#N/A	0.957447	0.477778	0.45	0.47	0.664447
MC_OchreR		Translucent	0.48	0.96	0.84	0.28	1.3	1.14286	0.291667	0.48	0.42	0.633345
MC_OchreR		Translucent	0.8	1.09	1.09	0.42	1.64	1	0.385321	0.545	0.545	0.933132
MC_OchreR		Dark Brown	#N/A	1.01	0.92	0.33	0.97	1.09783	0.326733	0.505	0.46	0.729792
MC_OchreR		Light Brown	0.78	1.41	1.44	0.51	1.73	0.979167	0.361702	0.705	0.72	1.59467
MC_OchreR		Dark Brown	#N/A	0.8	0.8	0.31	1.07	1	0.3875	0.4	0.4	0.502655
MC_OchreR		Light Brown	0.66	0.9	0.91	0.36	1.5	0.989011	0.4	0.45	0.455	0.643241
MC_OchreR		Dark Brown	0.56	1.02	1.1	0.39	1.52	0.927273	0.382353	0.51	0.55	0.881217
MC_OchreR		Light Brown	0.58	1.04	1	0.38	1.57	1.04	0.365385	0.52	0.5	0.816814
MC_OchreR		Dark Brown	0.32	0.96	1.05	0.29	0.94	0.914286	0.302083	0.48	0.525	0.791681
MC_OchreR		Translucent	0.72	0.96	1.05	0.39	1.63	0.914286	0.40625	0.48	0.525	0.791681
MC_OchreR		Black	#N/A	1.33	1.44	0.51	0.99	0.923611	0.383459	0.665	0.72	1.50419
MC_OchreR		Dark Brown	0.58	1.03	1.05	0.4	1.51	0.980952	0.38835	0.515	0.525	0.849408
MC_OchreR		Light Brown	#N/A	1.07	0.93	0.37	0.65	1.15054	0.345794	0.535	0.465	0.78155
MC_OchreR		Dark Brown	#N/A	1.1	1.2	0.62	1.1	0.916667	0.563636	0.55	0.6	1.03673
MC_OchreR		Black	#N/A	1.06	1.53	0.57	1.16	0.69281	0.537736	0.53	0.765	1.27376
MC_OchreR		Black	#N/A	2.03	2.26	0.98	1.71	0.89823	0.482759	1.015	1.13	3.60325
MC_OchreR		Dark Brown	#N/A	1.5	1.37	0.54	0.72	1.09489	0.36	0.75	0.685	1.61399
MC_OchreR		Translucent	0.56	0.83	0.71	0.27	1.11	1.16901	0.325301	0.415	0.355	0.462835
MC_OchreR		Dark Brown	0.77	1.31	1.28	0.38	1.71	1.02344	0.290076	0.655	0.64	1.31696
MC_OchreR		Dark Brown	0.78	1.12	1.13	0.47	1.68	0.99115	0.419643	0.56	0.565	0.994
MC_OchreR		Light Brown	0.45	0.5	0.56	0.22	0.89	0.892857	0.44	0.25	0.28	0.219911
MC_OchreR		Dark Brown	0.75	1.09	1.18	0.49	#N/A	0.923729	0.449541	0.545	0.59	1.01018
MC_OchreR		Dark Brown	0.46	1.01	1.06	0.45	#N/A	0.95283	0.445545	0.505	0.53	0.840847
MC_OchreR		Light Brown	0.56	0.78	0.92	0.41	1.24	0.847826	0.525641	0.39	0.46	0.563602
MC_OchreR		Dark Brown	#N/A	0.85	0.97	0.37	0.79	0.876289	0.435294	0.425	0.485	0.647561
MC_OchreR		Light Brown	0.6	0.97	1	0.41	1.41	0.97	0.42268	0.485	0.5	0.761836
MC_OchreR		Black	#N/A	1.3	1.12	0.45	1.14	1.16071	0.346154	0.65	0.56	1.14354
MC_OchreR		Dark Brown	0.59	1.17	0.85	0.31	1.51	1.37647	0.264957	0.585	0.425	0.781078
MC_OchreR		Dark Brown	0.47	1.31	1.11	0.37	0.96	1.18018	0.282443	0.655	0.555	1.14205
MC_OchreR		Dark Brown	0.65	1.28	1.31	0.48	1.57	0.977099	0.375	0.64	0.655	1.31696
MC_OchreR		Black	#N/A	0.87	0.8	#N/A	1.26	1.0875	#N/A	0.435	0.4	0.546637
MC_OchreR		Dark Brown	0.52	0.92	1.07	0.4	0.98	0.859813	0.434783	0.46	0.535	0.773146
MC_OchreR		Black	0.83	1.52	1.67	0.78	1.9	0.91018	0.513158	0.76	0.835	1.99365
MC_OchreR		Dark Brown	#N/A	2.66	3.34	1.4	2.63	0.796407	0.526316	1.33	1.67	6.97779
MC_OchreR		Light Brown	0.49	0.66	0.69	0.35	1.19	0.956522	0.530303	0.33	0.345	0.35767
MC_OchreR		Translucent	0.45	0.65	0.64	0.22	0.87	1.01562	0.338462	0.325	0.32	0.326726
MC_OchreR		Light Brown	#N/A	1.47	1.26	0.51	1.58	1.16667	0.346939	0.735	0.63	1.45471
MC_OchreR		Dark Brown	0.74	1.06	1.11	0.51	1.52	0.954955	0.481132	0.53	0.555	0.924099
MC_OchreR		Translucent	0.62	0.79	0.87	0.33	1.41	0.908046	0.417722	0.395	0.435	0.539804
MC_OchreR		Dark Brown	#N/A	0.7	0.72	0.2	0.84	0.972222	0.285714	0.35	0.36	0.395841
MC_OchreR		Dark Brown	#N/A	1.33	1.12	0.39	#N/A	1.1875	0.293233	0.665	0.56	1.16993
MC_OchreR		Light Brown	0.67	0.79	0.85	0.32	1.44	0.929412	0.405063	0.395	0.425	0.527395
MC_OchreR		Light Brown	#N/A	1.46	1.28	0.54	1.73	1.14062	0.369863	0.73	0.64	1.46775
MC_OchreR		Light Brown	0.61	0.93	0.81	0.37	1.35	1.14815	0.397849	0.465	0.405	0.59164
MC_OchreR		Dark Brown	0.45	0.54	0.54	0.22	0.91	1	0.407407	0.27	0.27	0.229022
MC_OchreR		Black	0.61	1.34	1.52	0.58	1.68	0.881579	0.432836	0.67	0.76	1.5997
MC_OchreR		Dark Brown	0.61	0.96	0.85	0.39	1.34	1.12941	0.40625	0.48	0.425	0.640885
MC_OchreR		Translucent	0.55	0.79	0.82	0.32	1.43	0.963415	0.405063	0.395	0.41	0.508781
MC_OchreR		Translucent	0.47	0.92	0.76	0.36	1.22	1.21053	0.391304	0.46	0.38	0.54915
MC_OchreR		Light Brown	0.71	1.06	1.1	0.36	1.56	0.963636	0.339623	0.53	0.55	0.915774
MC_OchreR		Dark Brown	#N/A	1.05	1.07	0.57	0.63	0.981308	0.542857	0.525	0.535	0.882395
MC_OchreR		Dark Brown	0.54	1.1	1.29	0.4	1.47	0.852713	0.363636	0.55	0.645	1.11448
MC_OchreR		Dark Brown	#N/A	1.97	1.98	0.6	#N/A	0.994949	0.304569	0.985	0.99	3.06352
MC_OchreR		Light Brown	0.82	1.34	1.2	0.52	#N/A	1.11667	0.38806	0.67	0.6	1.26292
MC_OchreR		Dark Brown	0.45	0.64	0.64	0.27	1.01	1	0.421875	0.32	0.32	0.321699
MC_OchreR		Dark Brown	#N/A	1.03	1.04	0.48	1.04	0.990385	0.466019	0.515	0.52	0.841319
MC_OchreR		Dark Brown	0.55	0.87	1.01	0.36	1.45	0.861386	0.413793	0.435	0.505	0.690129
MC_OchreR		Translucent	0.39	0.58	#N/A	#N/A	0.86	#N/A	#N/A	0.29	#N/A	#N/A
MC_OchreR		Dark Brown	0.58	0.91	0.9	0.27	1.32	1.01111	0.296703	0.455	0.45	0.643241
MC_OchreR		Light Brown	#N/A	0.89	1.04	0.48	#N/A	0.855769	0.539326	0.445	0.52	0.726965
MC_OchreR		Light Brown	0.53	0.86	0.94	0.4	#N/A	0.914894	0.465116	0.43	0.47	0.634916
MC_OchreR		Light Brown	0.48	1.04	1.05	0.39	1.2	0.990476	0.375	0.52	0.525	0.857655
MC_OchreR		Dark Brown	0.48	0.77	0.78	0.39	1.15	0.987179	0.506494	0.385	0.39	0.47171
MC_OchreR		Dark Brown	0.55	0.95	0.99	0.27	1.22	0.959596	0.284211	0.475	0.495	0.738667
MC_OchreR		Translucent	0.3	#N/A	#N/A	#N/A	0.85	#N/A	#N/A	#N/A	#N/A	#N/A
MC_OchreR		Translucent	0.44	0.85	0.99	0.35	1.42	0.858586	0.411765	0.425	0.495	0.660913
MC_OchreR		Dark Brown	#N/A	1.26	1.04	0.37	1.56	1.21154	0.293651	0.63	0.52	1.02919
MC_OchreR		Black	0.72	1.68	2.05	0.85	#N/A	0.819512	0.505952	0.84	1.025	2.70491
MC_OchreR		Dark Brown	0.42	0.61	#N/A	0.26	0.81	#N/A	0.42623	0.305	#N/A	#N/A
MC_OchreR		Dark Brown	#N/A	1.05	1.25	0.45	1.48	0.84	0.428571	0.525	0.625	1.03084
MC_OchreR		Translucent	0.53	1.02	0.98	0.42	1.41	1.04082	0.411765	0.51	0.49	0.785084
MC_OchreR		Black	0.83	#N/A	#N/A	0.91	#N/A	#N/A	#N/A	#N/A	#N/A	#N/A
MC_OchreR		Translucent	#N/A	0.87	0.98	0.29	#N/A	0.887755	0.333333	0.435	0.49	0.66963
MC_OchreR		Dark Brown	#N/A	1.23	0.96	0.41	1.54	1.28125	0.333333	0.615	0.48	0.927398
MC_OchreR		Dark Brown	0.59	1.11	1.48	0.61	#N/A	0.75	0.54955	0.555	0.74	1.29025
MC_OchreR		Translucent	0.52	0.82	0.8	0.32	1.25	1.025	0.390244	0.41	0.4	0.515221
MC_OchreR		Light Brown	0.57	0.75	0.74	0.37	1.12	1.01351	0.493333	0.375	0.37	0.435896
MC_OchreR		Translucent	#N/A	0.58	0.58	0.18	0.67	1	0.310345	0.29	0.29	0.264208
MC_OchreR		Dark Brown	#N/A	0.93	1.1	0.44	1.28	0.845455	0.473118	0.465	0.55	0.803462
MC_OchreR		Dark Brown	0.95	1.2	1.23	0.43	2.01	0.97561	0.358333	0.6	0.615	1.15925
MC_OchreR		Light Brown	0.59	0.66	0.76	0.31	#N/A	0.868421	0.469697	0.33	0.38	0.393956
MC_OchreR		Light Brown	0.53	0.83	0.68	0.28	1.2	1.22059	0.337349	0.415	0.34	0.443279
MC_OchreR		Light Brown	0.48	0.72	0.72	0.3	1.17	1	0.416667	0.36	0.36	0.40715
MC_OchreR		Translucent	0.37	0.6	0.45	#N/A	0.81	1.33333	#N/A	0.3	0.225	0.212058
MC_OchreR		Translucent	0.35	0.64	0.63	0.25	#N/A	1.01587	0.390625	0.32	0.315	0.316673
MC_OchreR		Translucent	0.41	0.77	0.87	0.29	1.28	0.885057	0.376623	0.385	0.435	0.526138
MC_OchreR		Light Brown	0.4	0.74	0.75	0.34	#N/A	0.986667	0.459459	0.37	0.375	0.435896
MC_OchreR		Dark Brown	0.95	2.06	2.58	1.24	#N/A	0.79845	0.601942	1.03	1.29	4.17423
MC_OchreR		Dark Brown	0.46	0.95	0.95	0.35	#N/A	1	0.368421	0.475	0.475	0.708822
MC_OchreR		Black	0.79	2.12	#N/A	0.91	2.05	#N/A	0.429245	1.06	#N/A	#N/A
MC_OchreR		Dark Brown	1.17	2.08	2.9	0.99	#N/A	0.717241	0.475962	1.04	1.45	4.73752
MC_OchreR		Dark Brown	0.69	1.93	1.45	0.67	#N/A	1.33103	0.34715	0.965	0.725	2.19794
MC_OchreR		Light Brown	0.36	0.65	0.64	0.25	0.88	1.01562	0.384615	0.325	0.32	0.326726
MC_OchreR		Dark Brown	0.73	1.47	1.36	0.52	#N/A	1.08088	0.353741	0.735	0.68	1.57017
MC_OchreR		Light Brown	0.39	1.08	0.76	0.23	#N/A	1.42105	0.212963	0.54	0.38	0.644655
MC_OchreR		Dark Brown	0.4	0.63	0.71	0.23	0.77	0.887324	0.365079	0.315	0.355	0.351309
MC_OchreR		Black	0.69	0.91	0.93	0.39	#N/A	0.978495	0.428571	0.455	0.465	0.664682
MC_OchreR		Translucent	0.44	0.58	0.55	0.25	0.87	1.05455	0.431034	0.29	0.275	0.250542
MC_OchreR		Dark Brown	0.5	0.58	0.65	0.25	1.08	0.892308	0.431034	0.29	0.325	0.296095
MC_OchreR		Dark Brown	0.47	0.92	0.92	0.31	#N/A	1	0.336957	0.46	0.46	0.664761
MC_OchreR		Dark Brown	0.48	1.15	#N/A	0.34	1.32	#N/A	0.295652	0.575	#N/A	#N/A
MC_OchreR		Black	0.62	1.18	1.18	0.4	1.35	1	0.338983	0.59	0.59	1.09359
MC_OchreR		Dark Brown	0.39	0.74	0.63	0.31	1.03	1.1746	0.418919	0.37	0.315	0.366153
MC_OchreR		Light Brown	0.57	0.54	0.8	0.35	#N/A	0.675	0.648148	0.27	0.4	0.339292
MC_OchreR		Dark Brown	0.41	0.57	0.58	0.27	#N/A	0.982759	0.473684	0.285	0.29	0.259653
MC_OchreR		Black	0.48	1.01	1.04	0.42	#N/A	0.971154	0.415842	0.505	0.52	0.824982
MC_OchreR		Dark Brown	0.48	0.84	0.87	0.33	1.27	0.965517	0.392857	0.42	0.435	0.573969
MC_OchreR		Dark Brown	0.51	0.77	0.84	0.45	#N/A	0.916667	0.584416	0.385	0.42	0.507996
MC_OchreR		Dark Brown	0.43	1.02	1.18	0.39	1.07	0.864407	0.382353	0.51	0.59	0.945305
MC_OchreR		Dark Brown	0.9	2	2.07	0.83	#N/A	0.966184	0.415	1	1.035	3.25155
MC_OchreR		Dark Brown	0.57	1.2	0.98	0.39	#N/A	1.22449	0.325	0.6	0.49	0.923628
MC_OchreR		Dark Brown	0.27	0.61	0.51	#N/A	0.61	1.19608	#N/A	0.305	0.255	0.244337
MC_OchreR		Translucent	0.4	0.56	0.41	0.15	0.86	1.36585	0.267857	0.28	0.205	0.180327
MC_OchreR	Atlas-1_1	Dark Brown	0.49	1.52	1.29	0.53	1.14	1.17829	0.348684	0.76	0.645	1.54001
MC_OchreR	Atlas-1_2	Dark Brown	0.54	1.11	0.97	0.41	0.92	1.14433	0.369369	0.555	0.485	0.845638
MC_OchreR	Atlas-1_3	Dark Brown	#N/A	1.21	1.08	0.47	1.2	1.12037	0.38843	0.605	0.54	1.02636
MC_OchreR	Atlas-1_4	Dark Brown	0.64	1.26	1.05	0.47	0.92	1.2	0.373016	0.63	0.525	1.03908
MC_OchreR	Atlas-1_5	Dark Brown	0.42	1.22	0.98	0.37	0.63	1.2449	0.303279	0.61	0.49	0.939022
MC_OchreR	Atlas-1_6	Dark Brown	0.34	0.86	0.81	0.31	0.64	1.06173	0.360465	0.43	0.405	0.547108
MC_OchreR	Atlas-1_7	Dark Brown	0.43	0.96	0.94	0.33	0.6	1.02128	0.34375	0.48	0.47	0.708743
MC_OchreR	DC-1_1	Dark Brown	0.57	1.34	1.14	#N/A	0.87	1.17544	#N/A	0.67	0.57	1.19977
MC_OchreR	DC-1_2	Dark Brown	#N/A	1.26	1.38	0.53	1.11	0.913043	0.420635	0.63	0.69	1.36565
MC_OchreR	DC-1_3	Dark Brown	#N/A	1.07	0.94	0.23	0.95	1.1383	0.214953	0.535	0.47	0.789953
MC_OchreR	DC-1_4	Black	0.78	1.72	2.03	0.73	0.95	0.847291	0.424419	0.86	1.015	2.7423
MC_OchreR	DC-1_5	Dark Brown	#N/A	1.17	1.11	0.23	1.02	1.05405	0.196581	0.585	0.555	1.02
MC_OchreR	DC-1_6	Dark Brown	0.41	1.06	1.04	0.44	0.9	1.01923	0.415094	0.53	0.52	0.865823
MC_OchreR	DC-1_7	Dark Brown	0.72	1.87	2.1	0.72	1.64	0.890476	0.385027	0.935	1.05	3.08426
MC_OchreR	LC_1-1	Dark Brown	1.51	3.35	3.72	1.65	3.13	0.900538	0.492537	1.675	1.86	9.78763
MC_OchreR	MC_1-1	Dark Brown	0.55	1.43	1.5	0.49	1.83	0.953333	0.342657	0.715	0.75	1.68468
MC_OchreR	MC_1-2	Dark Brown	1.15	1.7	2.03	0.78	2.16	0.837438	0.458824	0.85	1.015	2.71041
MC_OchreR	MC_1-3	Dark Brown	0.78	1.39	1.64	0.57	1.77	0.847561	0.410072	0.695	0.82	1.79039
MC_OchreR	MC_1-4	Dark Brown	1.07	2.16	2.46	0.88	2.98	0.878049	0.407407	1.08	1.23	4.17329
MC_OchreR	MC_1-5	Dark Brown	1.25	2.4	2.85	1.1	2.93	0.842105	0.458333	1.2	1.425	5.37212
MC_OchreR	MC_1-6	Dark Brown	1.19	2.38	2.4	0.9	2.95	0.991667	0.378151	1.19	1.2	4.48619
MC_OchreR	MC_1-7	Dark Brown	#N/A	1.89	2.35	#N/A	1.91	0.804255	#N/A	0.945	1.175	3.48835
MC_OchreR	MC_1-8	Dark Brown	0.88	1.66	1.55	0.51	2.07	1.07097	0.307229	0.83	0.775	2.02083
MC_OchreR	MC_1-9	Dark Brown	1.07	2.07	2.06	0.55	2.56	1.00485	0.2657	1.035	1.03	3.34909
MC_OchreR	MC_1-10	Dark Brown	0.85	1.8	1.98	0.86	2.27	0.909091	0.477778	0.9	0.99	2.79916
MC_OchreR	MC_1-11	Dark Brown	1.44	1.92	2.05	0.86	2.27	0.936585	0.447917	0.96	1.025	3.09133
MC_OchreR	MP_1-1	Dark Brown	1.2	1.73	2.5	#N/A	3.26	0.692	#N/A	0.865	1.25	3.39685
MC_OchreR	MP_1-2	Dark Brown	2.04	#N/A	#N/A	#N/A	3.5	#N/A	#N/A	#N/A	#N/A	#N/A
MC_OchreR	MP_1-3	Dark Brown	2.41	2.6	3.6	1.3	#N/A	0.722222	0.5	1.3	1.8	7.35133
MC_Ditch	Atlas-1_1	Dark Brown		1.11	0.95	0.33	1.1	1.16842	0.297297	0.555	0.475	0.828202
MC_Ditch	Atlas-1_2	Dark Brown		0.53	0.73	0.3	0.25	0.726027	0.566038	0.265	0.365	0.303871
MC_Ditch	Atlas-1_3	Dark Brown		1.45	1.31	0.49	0.63	1.10687	0.337931	0.725	0.655	1.49186
MC_Ditch	Atlas-1_4	Dark Brown		1.08	1.25	0.52	0.9	0.864	0.481481	0.54	0.625	1.06029
MC_Ditch	Atlas-1_5	Dark Brown		1.14	1.01	0.39	0.69	1.12871	0.342105	0.57	0.505	0.904307
MC_Ditch	Atlas-1_6	Dark Brown		1.04	1.2	0.44	0.53	0.866667	0.423077	0.52	0.6	0.980177
MC_Ditch	Atlas-1_7	Dark Brown		0.94	0.88	0.34	0.5	1.06818	0.361702	0.47	0.44	0.649681
MC_Ditch	Atlas-1_8	Dark Brown		1.24	1.04	0.43	0.88	1.19231	0.346774	0.62	0.52	1.01285
MC_Ditch	Atlas-1_9	Dark Brown		1.06	1.03	0.35	0.74	1.02913	0.330189	0.53	0.515	0.857498
MC_Ditch	Atlas-1_10	Dark Brown		1.07	0.97	0.31	0.83	1.10309	0.28972	0.535	0.485	0.815165
MC_Ditch	Atlas-1_11	Dark Brown		1.3	1.19	0.47	0.79	1.09244	0.361538	0.65	0.595	1.21501
MC_Ditch	LC_1-1	Dark Brown	1.78	2.43	3.57	1.65	4.19	0.680672	0.679012	1.215	1.785	6.81341
MC_Ditch	LC_1-3	Dark Brown	1.33	4.37	4.83	2.39	3.72	0.904762	0.546911	2.185	2.415	16.5775
MC_Ditch	LC_1-4	Dark Brown	1.35	2.59	2.36	0.92	2.97	1.09746	0.355212	1.295	1.18	4.80067
MC_Ditch	LC_1-5	Dark Brown		1.97	2.48	1.08	2.38	0.794355	0.548223	0.985	1.24	3.83714
MC_Ditch	LC_1-6	Black	1.59	2.7	2.55	0.98	2.98	1.05882	0.362963	1.35	1.275	5.40747
MC_Ditch	LC_1-7	Dark Brown		2.76	3.08	1.43	3.02	0.896104	0.518116	1.38	1.54	6.67651
MC_Ditch	LC_1-8	Dark Brown		2.41	2.56	0.96	3.56	0.941406	0.39834	1.205	1.28	4.84559
MC_Ditch	LC_1-9	Black		2.78	2.42	1	3.67	1.14876	0.359712	1.39	1.21	5.28384
MC_Ditch	LC_1-10	Dark Brown	1.15	2.82	2.93	0.99	3.52	0.962457	0.351064	1.41	1.465	6.48943
MC_Ditch	LC_1-11	Dark Brown		2.41	3.19	1.47	2.72	0.755486	0.609959	1.205	1.595	6.03806
MC_Ditch	LC_1-12	Black	2.12	3.55	3.38	1.44	4.31	1.0503	0.405634	1.775	1.69	9.42399
MC_Ditch	LC_1-13	Dark Brown		3.02	4.21	1.6	4.57	0.71734	0.529801	1.51	2.105	9.98571
MC_Ditch	LC_1-15	Dark Brown		2.14	2.46	0.9	3.7	0.869919	0.420561	1.07	1.23	4.13465
MC_Ditch	LP_1-1	Light Brown	#N/A	4.29	4.3	1.72	#N/A	0.997674	0.400932	2.145	2.15	14.4882
MC_Ditch	LP_1-3	Light Brown	0.9	3.9	4.16	1.85	2.37	0.9375	0.474359	1.95	2.08	12.7423
MC_Ditch	LP_1-4	Dark Brown		2.91	3.18	1.36		0.915094	0.467354	1.455	1.59	7.26792
MC_Ditch	LP_1-5	Dark Brown		3.06	2.83		3.75	1.08127	0	1.53	1.415	6.80139
MC_Ditch	LP_1-6	Dark Brown		3.08	3.44	1.65		0.895349	0.535714	1.54	1.72	8.32145
MC_Ditch	LP_1-7	Dark Brown		4	4.27	1.9	2.63	0.936768	0.475	2	2.135	13.4146
MC_Ditch	LP_1-8+9	Dark Brown		6.84		3.03	4.19	#DIV/0!	0.442982	3.42	0	0
MC_Ditch	LP_1-10	Dark Brown	1.28		3.35	1.69		0	#DIV/0!	0	1.675	0
MC_Ditch	LP_1-11	Dark Brown		3.14	3.81	1.37		0.824147	0.436306	1.57	1.905	9.39603
MC_Ditch	LP_1-12	Dark Brown		2.38	2.94	0.81		0.809524	0.340336	1.19	1.47	5.49559
MC_Ditch	LP_1-13	Dark Brown	1.75	2.55	3.95	1.78		0.64557	0.698039	1.275	1.975	7.91092
MC_Ditch	LP_1-14	Dark Brown		3.73	4.13	1.7		0.903148	0.455764	1.865	2.065	12.099
MC_Ditch	LP_1-15	Dark Brown	1.54	2.31	2.87	1.47		0.804878	0.636364	1.155	1.435	5.20695
MC_Ditch	LP_1-16	Dark Brown		4.28	4	1.37		1.07	0.320093	2.14	2	13.446
MC_Ditch	LP_1-17	Black	1.89	4.52	4.22	1.93	2.74	1.07109	0.426991	2.26	2.11	14.981
MC_Ditch	LP_1-18	Dark Brown	1.46	2.4	3.04	1.1		0.789474	0.458333	1.2	1.52	5.73027
MC_Ditch	LP_1-19	Dark Brown	2.1	4.4	5.14	2.3		0.856031	0.522727	2.2	2.57	17.7626
MC_Ditch	LP_1-20	Dark Brown		3.05	2.87	0.92		1.06272	0.301639	1.525	1.435	6.87498
MC_Ditch	LP_1-21	Dark Brown		3.26	2.8	1.52		1.16429	0.466258	1.63	1.4	7.16911
MC_Ditch	LP_1-22	Dark Brown		2.42	2.84	1.16		0.852113	0.479339	1.21	1.42	5.39788
MC_Ditch	LP_1-23	Dark Brown		2.92	3.15	1.39		0.926984	0.476027	1.46	1.575	7.22409
MC_Ditch	LP_1-24	Dark Brown		2.74	2.63	0.81		1.04183	0.29562	1.37	1.315	5.65974
MC_Ditch	LP_1-25	Black	2.36	3.59		1.86		#DIV/0!	0.518106	1.795	0	0
MC_Ditch	LP_1-26	Dark Brown	2.29	4.4	3.98	2.28		1.10553	0.518182	2.2	1.99	13.7539
MC_Ditch	LP_1-27	Dark Brown	1.37	3.04	3.64	1.49		0.835165	0.490132	1.52	1.82	8.6909
MC_Ditch	LP_1-28	Dark Brown	1.01	2.34	2.69	1.22		0.869888	0.521368	1.17	1.345	4.94377
MC_Ditch	MC_1-1	Dark Brown	0.84	2.3	2.32	#N/A	2.59	0.991379	#N/A	1.15	1.16	4.19088
MC_Ditch	MC_1-2	Dark Brown	1.09	1.99	2.22	0.59	2.67	0.896396	0.296482	0.995	1.11	3.46973
MC_Ditch	MC_1-3	Dark Brown	1.16	1.84	2.54	0.9	2.26	0.724409	0.48913	0.92	1.27	3.67064
MC_Ditch	MC_1-4	Dark Brown	0.99	1.52	2.63	1.2	2.15	0.577947	0.789474	0.76	1.315	3.13971
MC_Ditch	MC_1-5	Dark Brown	0.46	1.46	1.64	0.45	1.49	0.890244	0.308219	0.73	0.82	1.88056
MC_Ditch	MC_1-6	Dark Brown	0.61	2.49	2.13	0.7	1.61	1.16901	0.281124	1.245	1.065	4.16552
MC_Ditch	MC_1-7	Dark Brown	0.67	1.31	1.3	0.36	1.87	1.00769	0.274809	0.655	0.65	1.33753
MC_Ditch	MC_1-8	Black	0.56	1.46	1.95	0.55	1.17	0.748718	0.376712	0.73	0.975	2.23603
MC_Ditch	MC_1-9	Dark Brown	1.4	1.66	2.3	0.95	2.61	0.721739	0.572289	0.83	1.15	2.99865
MC_Ditch	MC_1-10	Dark Brown	1.4	1.82	2.03	0.71	2.61	0.896552	0.39011	0.91	1.015	2.90173
MC_Ditch	MC_1-11	Dark Brown	0.69	1.11	1.19	0.37	1.79	0.932773	0.333333	0.555	0.595	1.03743
MC_Ditch	MP_1-1	Dark Brown	1.38	2.75	2.84	1.12	#N/A	0.96831	0.407273	1.375	1.42	6.13396
MC_Ditch	MP_1-2	Dark Brown	1.53	2.74	2.79	1.05	#N/A	0.982079	0.383212	1.37	1.395	6.00405
MC_Ditch	MP_1-3	Dark Brown	0.84	0.99	1.21	0.52	1.5	0.818182	0.525253	0.495	0.605	0.940828
MC_Ditch	MP_1-4	Dark Brown	0.75	1.77	2.19	0.94	2	0.808219	0.531073	0.885	1.095	3.04444
MC_Ditch	MP_1-5	Translucent	0.65	1.48	1.12	0.42	1.83	1.32143	0.283784	0.74	0.56	1.30188
MC_Ditch	MP_1-6	Dark Brown		2.62	2.27	1.1		1.15419	0.419847	1.31	1.135	4.67108
MC_Ditch	MP_1-7	Dark Brown	1.83	2.09	2.11	1.05		0.990521	0.502392	1.045	1.055	3.46353
MC_Ditch	SC_1-1	Light Brown	0.52	0.64	0.7	0.25	1.29	0.914286	0.390625	0.32	0.35	0.351858
MC_Ditch	SC_1-2	Light Brown	0.62	1.17	1.08	0.43	1.59	1.08333	0.367521	0.585	0.54	0.992429
MC_Ditch	SC_1-3	Light Brown	0.74	1.45	1.58	0.58	1.73	0.917722	0.4	0.725	0.79	1.79935
MC_Ditch	SC_1-4	Light Brown	0.56	1.06	1.22	0.4	1.5	0.868852	0.377358	0.53	0.61	1.01568
MC_Ditch	SC_1-5	Light Brown	1.02	1.08	1.3	0.54	1.82	0.830769	0.5	0.54	0.65	1.1027
MC_Ditch	SC_1-6	Light Brown	0.43	0.64	0.8	0.37	1.07	0.8	0.578125	0.32	0.4	0.402124
MC_Ditch	SC_1-7	Light Brown	0.5	1.43	1.56	0.62	1.25	0.916667	0.433566	0.715	0.78	1.75207
MC_Ditch	SC_1-8	Light Brown	0.59	1.16	1.07	0.47	1.33	1.08411	0.405172	0.58	0.535	0.974836
MC_Ditch	SC_1-9	Light Brown	0.66	1.36	1.3	0.62	1.69	1.04615	0.455882	0.68	0.65	1.38858
MC_Ditch	SC_1-10	Light Brown	0.71	1	1.59	0.7	2.12	0.628931	0.7	0.5	0.795	1.24878
MC_Ditch	SC_1-11	Dark Brown	0.52	1.67	2.49	0.93	1.27	0.670683	0.556886	0.835	1.245	3.26592
MC_Ditch	SC_1-12	Dark Brown	0.64	1.29	1.31	0.5	1.86	0.984733	0.387597	0.645	0.655	1.32724
MC_Ditch	SC_1-13	Light Brown	0.54	1.19	1.25	0.44	1.31	0.952	0.369748	0.595	0.625	1.16828
MC_Ditch	SC_1-14	Dark Brown	0.71	1.15	1.27	0.64	1.83	0.905512	0.556522	0.575	0.635	1.14707
MC_Ditch	SC_1-15	Dark Brown	0.49	1.56	1.52	0.45	1.46	1.02632	0.288462	0.78	0.76	1.86234
MC_Ditch	SC_1-16	Dark Brown	0.52	1.17	1.24	0.42	1.47	0.943548	0.358974	0.585	0.62	1.13946
MC_Ditch	SC_1-17	Dark Brown	0.5	1.22	1.04	0.37	1.46	1.17308	0.303279	0.61	0.52	0.996513
MC_Ditch	SC_1-18	Dark Brown	0.69	1.61	1.11	0.56	1.67	1.45045	0.347826	0.805	0.555	1.40359
MC_Ditch	SC_1-19	Dark Brown	0.44	1.09	0.85	0.38	1.21	1.28235	0.348624	0.545	0.425	0.727671
MC_Ditch	SC_1-20	Dark Brown	0.5	1.02	0.86	0.29	1.43	1.18605	0.284314	0.51	0.43	0.688951
MC_Ditch	SC_1-21	Dark Brown	0.55	1.82	2.17	0.7	1.09	0.83871	0.384615	0.91	1.085	3.10185
MC_Ditch	SC_1-22	Dark Brown	0.65	1.08	1.11	0.44	1.59	0.972973	0.407407	0.54	0.555	0.941535
MC_Ditch	SC_1-23	Dark Brown	0.63	0.98	1.03	0.4	1.48	0.951456	0.408163	0.49	0.515	0.792781
MC_Ditch	SC_1-24	Light Brown	0.74	1.2	1.1	0.48	1.71	1.09091	0.4	0.6	0.55	1.03673
MC_Ditch	SC_1-25	Dark Brown	0.61	1.08	1.11	0.47	1.59	0.972973	0.435185	0.54	0.555	0.941535
MC_Ditch	SC_1-26	Dark Brown	0.69	1.43	1.45	0.68	1.62	0.986207	0.475524	0.715	0.725	1.62852
MC_Ditch	SC_1-27	Dark Brown	0.43	1.37	1.71	0.72	1.13	0.80117	0.525547	0.685	0.855	1.83995
MC_Ditch	SC_1-28	Dark Brown	0.62	1.77	1.8	0.71	1.53	0.983333	0.40113	0.885	0.9	2.50228
MC_Ditch	SC_1-29	Dark Brown	0.86	1.4	1.42	0.65	1.72	0.985915	0.464286	0.7	0.71	1.56137
MC_Ditch	SC_1-30	Light Brown	0.52	0.83	0.96	0.37	1.21	0.864583	0.445783	0.415	0.48	0.625805
MC_Ditch	SC_1-31	Light Brown	0.48	1.41	1.57	0.58	1.12	0.898089	0.411348	0.705	0.785	1.73864
MC_Ditch	SC_1-32	Light Brown	0.66	0.97	1.12	0.37	1.64	0.866071	0.381443	0.485	0.56	0.853257
MC_Ditch	SC_1-33	Light Brown	0.57	1.35	1.9	0.7	1.2	0.710526	0.518519	0.675	0.95	2.01455
MC_Ditch	SC_1-34	Light Brown	0.32	1.37	1.47	0.5	0.87	0.931973	0.364964	0.685	0.735	1.58171
MC_Ditch	SC_1-35	Dark Brown	0.46	1.02	1.17	0.43	1.19	0.871795	0.421569	0.51	0.585	0.937294
MC_Ditch	SC_1-36	Dark Brown	0.67	1.12	1.05	0.46	1.45	1.06667	0.410714	0.56	0.525	0.923628
MC_Ditch	SC_1-37	Dark Brown	0.68	1.04	1.46	0.49	1.25	0.712329	0.471154	0.52	0.73	1.19255
MC_Ditch	SC_1-38	Dark Brown	0.52	0.91	0.9	0.38	1.32	1.01111	0.417582	0.455	0.45	0.643241
MC_Ditch	SC_1-39	Dark Brown	0.65	1.02	1.17	0.44	1.39	0.871795	0.431373	0.51	0.585	0.937294
MC_Ditch	SC_1-40	Dark Brown	0.57	1.08	1	0.42	1.43	1.08	0.388889	0.54	0.5	0.84823
MC_Ditch	SC_1-41	Dark Brown	0.46	0.95	1	0.36	1.23	0.95	0.378947	0.475	0.5	0.746128
MC_Ditch	SC_1-42	Dark Brown	0.75	1.35	1.57	0.6	1.8	0.859873	0.444444	0.675	0.785	1.66465
MC_Ditch	SC_1-43	Dark Brown	0.33	1.04	1.02	0.34	0.99	1.01961	0.326923	0.52	0.51	0.83315
MC_Ditch	SC_1-44	Light Brown	0.52	1.08	0.92	0.37	1.48	1.17391	0.342593	0.54	0.46	0.780372
MC_Ditch	SC_1-45	Light Brown	0.6	1.03	1.04	0.43	1.47	0.990385	0.417476	0.515	0.52	0.841319
MC_Ditch	SC_1-46	Dark Brown	0.51	1.26	1.44	0.53	1.28	0.875	0.420635	0.63	0.72	1.42503
MC_Ditch	SC_1-47	Dark Brown	0.65	1.07	0.94	0.37	1.58	1.1383	0.345794	0.535	0.47	0.789953
MC_Ditch	SC_1-48	Dark Brown	0.58	1.38	1.43	0.62	1.18	0.965035	0.449275	0.69	0.715	1.5499
MC_Ditch	SC_1-49	Dark Brown	0.48	0.93	0.85	0.36	1.15	1.09412	0.387097	0.465	0.425	0.620857
MC_Ditch	SC_1-50	Dark Brown	0.49	1.11	1.13	0.45	1.29	0.982301	0.405405	0.555	0.565	0.985125
MC_Ditch	SC_1-51	Translucent	0.45	0.83	0.85	0.3	1.3	0.976471	0.361446	0.415	0.425	0.554098
MC_Ditch	SC_1-52	Light Brown	0.34	1.33	1.41	0.44	0.84	0.943262	0.330827	0.665	0.705	1.47286
MC_Ditch	SC_1-53	Dark Brown	0.58	1.63	1.93	0.82	1.32	0.84456	0.503067	0.815	0.965	2.47078
MC_Ditch	SC_1-54	Light Brown	0.36	0.74	0.66	0.24	0.95	1.12121	0.324324	0.37	0.33	0.383588
MC_Ditch	SC_1-55	Dark Brown	0.38	0.94	1.03	0.38	0.88	0.912621	0.404255	0.47	0.515	0.760423
MC_Ditch	SC_1-56	Dark Brown	0.47	0.99	0.93	0.31	1.29	1.06452	0.313131	0.495	0.465	0.723116
MC_Ditch	SC_1-57	Translucent	0.42	0.65	0.62	0.21	0.96	1.04839	0.323077	0.325	0.31	0.316515
MC_Ditch	SC_1-58	Dark Brown	0.52	1.79	1.81	0.72	1.73	0.98895	0.402235	0.895	0.905	2.54461
MC_Ditch	SC_1-59	Dark Brown	0.42	1.08	1.17	0.34	1.15	0.923077	0.314815	0.54	0.585	0.992429
MC_Ditch	SC_1-60	Dark Brown	0.59	1.35	1.45	0.6	1.35	0.931034	0.444444	0.675	0.725	1.53742
MC_Ditch	SC_2-61	Light Brown	0.79	1.25	1.6	0.49	1.73	0.78125	0.392	0.625	0.8	1.5708
MC_Ditch	SC_2-62	Dark Brown	0.56	1.05	1.02	0.41	1.22	1.02941	0.390476	0.525	0.51	0.841161
MC_Ditch	SC_2-63	Dark Brown	0.62	1.32	1.21	0.43	1.35	1.09091	0.325758	0.66	0.605	1.25444
MC_Ditch	SC_2-64	Dark Brown	0.67	1.34	1.04	0.32	1.5	1.28846	0.238806	0.67	0.52	1.09453
MC_Ditch	SC_2-65	Dark Brown	0.6	1.15	1.13	0.41	1.61	1.0177	0.356522	0.575	0.565	1.02062
MC_Ditch	SC_2-66	Dark Brown	0.57	1.36	1.15	1.21	1.37	1.18261	0.889706	0.68	0.575	1.22836
MC_Ditch	SC_2-67	Dark Brown	0.56	1.15	1.04	0.43	1.57	1.10577	0.373913	0.575	0.52	0.939336
MC_Ditch	SC_2-68	Dark Brown	0.42	1.09	1.05	0.42	1.27	1.0381	0.385321	0.545	0.525	0.898888
MC_Ditch	SC_2-69	Light Brown	0.69	1.22	1.46	0.4	1.35	0.835616	0.327869	0.61	0.73	1.39895
MC_Ditch	SC_2-70	Dark Brown	0.57	1.14	1.03	0.41	1.56	1.1068	0.359649	0.57	0.515	0.922215
MC_Ditch	SC_2-71	Dark Brown	0.77	1.57	1.5	0.55	1.61	1.04667	0.350318	0.785	0.75	1.84961
MC_Ditch	SC_2-72	Dark Brown	0.43	1.22	1.46	0.48	1.12	0.835616	0.393443	0.61	0.73	1.39895
MC_Ditch	SC_2-73	Dark Brown	0.44	1.11	1.27	0.35	1.03	0.874016	0.315315	0.555	0.635	1.10718
MC_Ditch	SC_2-74	Dark Brown	0.59	1	1.07	0.35	1.48	0.934579	0.35	0.5	0.535	0.840376
MC_Ditch	SC_2-75	Light Brown	0.65	1.21	0.98	0.34	1.8	1.23469	0.280992	0.605	0.49	0.931325
MC_Ditch	SC_2-76	Dark Brown	0.69	1.34	1.2	0.44	1.77	1.11667	0.328358	0.67	0.6	1.26292
MC_Ditch	SC_2-77	Dark Brown	0.55	1.15	1.15	0.46	1.35	1	0.4	0.575	0.575	1.03869
MC_Ditch	SC_2-78	Dark Brown	0.48	0.76	0.83	0.26	1.21	0.915663	0.342105	0.38	0.415	0.495429
MC_Ditch	SC_2-79	Dark Brown	0.55	1.01	0.92	0.4	1.29	1.09783	0.39604	0.505	0.46	0.729792
MC_Ditch	SC_2-80	Light Brown	0.54	0.96	0.99	0.36	1.43	0.969697	0.375	0.48	0.495	0.746442
MC_Ditch	SC_2-81	Dark Brown	0.36	0.96	1.16	0.36	0.86	0.827586	0.375	0.48	0.58	0.874619
MC_Ditch	SC_2-82	Dark Brown	0.79	1.28	1.28	0.41	1.78	1	0.320312	0.64	0.64	1.2868
MC_Ditch	SC_2-83	Dark Brown	0.54	1.19	1.22	0.48	1.21	0.97541	0.403361	0.595	0.61	1.14024
MC_Ditch	SC_2-84	Dark Brown	0.75	1.15	1.39	0.54	1.79	0.827338	0.469565	0.575	0.695	1.25546
MC_Ditch	SC_2-85	Dark Brown	0.56	0.86	0.99	0.34	1.37	0.868687	0.395349	0.43	0.495	0.668688
MC_Ditch	SC_2-86	Dark Brown	0.61	1	1.09	0.43	1.53	0.917431	0.43	0.5	0.545	0.856084
MC_Ditch	SC_2-87	Dark Brown	0.76	1.05	1.45	0.5	1.51	0.724138	0.47619	0.525	0.725	1.19577
MC_Ditch	SC_2-88	Dark Brown	0.53	1.44	1.74	0.75	1.18	0.827586	0.520833	0.72	0.87	1.96789
MC_Ditch	SC_2-89	Dark Brown	0.58	0.86	0.92	0.32	1.36	0.934783	0.372093	0.43	0.46	0.621407
MC_Ditch	SC_2-90	Light Brown	0.45	0.72	0.72	0.24	1.17	1	0.333333	0.36	0.36	0.40715
MC_Ditch	SC_2-91	Translucent	0.34	0.71	0.49	0.16	0.95	1.44898	0.225352	0.355	0.245	0.27324
MC_Ditch	SC_2-92	Light Brown	0.36	0.52	0.8	0.28	1.01	0.65	0.538462	0.26	0.4	0.326726
MC_Ditch	SC_2-93	Dark Brown	0.53	1.17	1.18	0.32	1.23	0.991525	0.273504	0.585	0.59	1.08432
MC_Ditch	SC_2-94	Dark Brown	0.62	1.17	1.13	0.55	1.56	1.0354	0.470085	0.585	0.565	1.03837
MC_Ditch	SC_2-95	Light Brown	0.46	0.79	0.84	0.28	1.05	0.940476	0.35443	0.395	0.42	0.52119
MC_Ditch	SC_2-96	Light Brown	0.34	0.9	1.15	0.36	0.87	0.782609	0.4	0.45	0.575	0.812887
MC_Ditch	SC_2-97	Dark Brown	0.57	0.89	0.78	0.26	1.48	1.14103	0.292135	0.445	0.39	0.545223
MC_Ditch	SC_2-98	Light Brown	0.32	0.88	0.56	0.13	0.68	0.886957	0.411765	0.51	0.575	0.921272
MC_Ditch	SC_2-99	Dark Brown						#DIV/0!	#DIV/0!	0	0	0
MC_Ditch	SC_2-100	Dark Brown						#DIV/0!	#DIV/0!	0	0	0
MC_Ditch	SP_1-1	Dark Brown	0.54	0.8	0.69	0.33	1.29	1.15942	0.4125	0.4	0.345	0.43354
MC_Ditch	SP_1-2	Light Brown	0.29	0.78	0.75	0.29	0.8	1.04	0.371795	0.39	0.375	0.459458
MC_Ditch	SP_1-3	Dark Brown	0.58	1.04	0.98	0.34		1.06122	0.326923	0.52	0.49	0.800478
MC_Ditch	SP_1-4	Dark Brown	0.24	0.99	1.06	0.29	0.75	0.933962	0.292929	0.495	0.53	0.824197
MC_Ditch	SP_1-5	Light Brown	0.48	0.84	0.92	0.25		0.913043	0.297619	0.42	0.46	0.606956
MC_Ditch	SP_1-6	Dark Brown	0.37	0.91	0.64	0.23		1.42188	0.252747	0.455	0.32	0.457416
MC_Ditch	SP_1-7	Light Brown	0.85	1.04	1.17	0.42		0.888889	0.403846	0.52	0.585	0.955672
MC_Ditch	SP_1-8	Light Brown	0.78	1.45	1.6	0.72	1.35	0.90625	0.496552	0.725	0.8	1.82212
MC_Ditch	SP_1-9	Light Brown	0.9	1.55	1.85	0.75		0.837838	0.483871	0.775	0.925	2.25213
MC_Ditch	SP_1-10	Light Brown	0.75	1.01	1.57	0.36		0.643312	0.356436	0.505	0.785	1.24541
MC_Ditch	SP_1-11	Light Brown	0.5	0.88	0.88	0.26		1	0.295455	0.44	0.44	0.608212
MC_Ditch	SP_1-12	Light Brown	0.67	1.24	1.07	0.41	1.46	1.15888	0.330645	0.62	0.535	1.04207
MC_Ditch	SP_1-13	Light Brown	0.67	1.02	1.15	0.42		0.886957	0.411765	0.51	0.575	0.921272
MC_Ditch	SP_1-14	Light Brown	0.51	0.99	0.97	0.36		1.02062	0.363636	0.495	0.485	0.754218
MC_Ditch	SharkV_1-1	Dark Brown		3.78	3.88	1.53	2.31	0.974227	0.404762	1.89	1.94	11.519
MC_Ditch	SharkV_1-2	Dark Brown		3.71	4.02	1.84	2.3	0.922886	0.495957	1.855	2.01	11.7136
LaurierLS	Atlas-1_1	Black	0.57	1.19	1.16	0.5	0.7	1.02586	0.420168	0.595	0.58	1.08416
LaurierLS	Atlas-1_2	Black	0.72	1.39	1.15	0.48	0.71	1.2087	0.345324	0.695	0.575	1.25546
LaurierLS	Atlas-1_3	Black	0.79	1.34	1.34	0.58		1	0.432836	0.67	0.67	1.41026
LaurierLS	Atlas-1_4	Black	0.71	1.11	0.91	0.44	1.1	1.21978	0.396396	0.555	0.455	0.793331
LaurierLS	Atlas-1_5	Black	0.55	0.78	0.72	0.31	0.59	1.08333	0.397436	0.39	0.36	0.44108
LaurierLS	Atlas-1_6	Black	0.45	0.93	0.87	0.45	0.59	1.06897	0.483871	0.465	0.435	0.635466
LaurierLS	Atlas-1_7	Black	0.58	1.32	1.09	0.45	0.85	1.21101	0.340909	0.66	0.545	1.13003
LaurierLS	Atlas-1_8	Black	0.45	0.88	0.84	0.36	0.61	1.04762	0.409091	0.44	0.42	0.580566
LaurierLS	Atlas-1_9	Black	0.4	0.98	0.82	0.37	0.73	1.19512	0.377551	0.49	0.41	0.631146
LaurierLS	Atlas-1_10	Black	0.47	0.63	0.6	0.26	0.86	1.05	0.412698	0.315	0.3	0.296881
LaurierLS	Atlas-1_11	Black	0.2	0.69	0.64	0.31	0.42	1.07812	0.449275	0.345	0.32	0.346832	Lost after being measured
LaurierLS	Atlas-1_12	Black	0.44	1.03	1.1	0.42	0.75	0.936364	0.407767	0.515	0.55	0.889856
LaurierLS	Atlas-1_13	Black	0.5	1.26	1.22	0.62	0.91	1.03279	0.492063	0.63	0.61	1.20731
LaurierLS	Atlas-1_14	Black	0.52	1.08	1.07	0.46	0.95	1.00935	0.425926	0.54	0.535	0.907606
LaurierLS	Atlas-1_15	Black	0.5	1.03	1.04	0.49	0.71	0.990385	0.475728	0.515	0.52	0.841319
LaurierLS	Atlas-1_16	Black	0.53	1.06	0.83	0.37	0.62	1.27711	0.349057	0.53	0.415	0.690993
LaurierLS	Atlas-1_17	Black	0.45	0.95	0.75	0.33	0.83	1.26667	0.347368	0.475	0.375	0.559596
LaurierLS	Atlas-1_18	Black	0.49	1.04	0.82	0.33	0.6	1.26829	0.317308	0.52	0.41	0.669788
LaurierLS	Atlas-1_19	Black	0.44	0.86	0.78	0.42	0.67	1.10256	0.488372	0.43	0.39	0.526845
LaurierLS	Atlas-1_20	Black	0.45	0.89	0.77	0.36	0.65	1.15584	0.404494	0.445	0.385	0.538233
LaurierLS	Atlas-1_21	Black	0.46	0.94	0.82	0.31	0.62	1.14634	0.329787	0.47	0.41	0.605385
LaurierLS	LP_1-1	Dark Brown	1.81	2.28	2.42	0.95		0.942149	0.416667	1.21	1.21	4.59961
LaurierLS	LP_1-2	Dark Brown	1.45	3.21	2.82	1.09		1.1383	0.339564	1.41	1.41	6.2458
LaurierLS	LC_1-1	Dark Brown	0.64	1.17	1.19	0.46	1.5	0.983193	0.393162	0.595	0.595	1.1122
LaurierLS	LC_1-2	Dark Brown	0.69	1.23	1.18	0.45	1.61	1.04237	0.365854	0.59	0.59	1.09359
LaurierLS	LC_1-3	Dark Brown	0.68	1.28	1.27	0.43	1.15	1.00787	0.335938	0.635	0.635	1.26677
LaurierLS	MC_1-1	Dark Brown	0.7	0.98	0.97	0.36	1.4	1.01031	0.367347	0.485	0.485	0.738981
LaurierLS	MC_1-2	Dark Brown	0.68	1.05	1.1	0.49	1.54	0.954545	0.466667	0.55	0.55	0.950332
LaurierLS	MC_1-3	Dark Brown	0.74	1.12	1.13	0.5	1.65	0.99115	0.446429	0.565	0.565	1.00287
LaurierLS	MC_1-4	Dark Brown	0.61	0.88	0.89		1.23	0.988764	0	0.445	0.445	0.622114
LaurierLS	MC_1-5	Dark Brown	0.72	1.12	1.1	0.4	1.57	1.01818	0.357143	0.55	0.55	0.950332
LaurierLS	MC_1-6	Dark Brown	0.51	0.98	0.94	0.29	0.96	1.04255	0.295918	0.47	0.47	0.693978
LaurierLS	SC_1-1	Dark Brown	0.65	0.84	0.88	0.35	1.33	0.954545	0.416667	0.44	0.44	0.608212
LaurierLS	SC_1-2	Dark Brown	0.54	0.79	0.8	0.25	1.15	#REF!	0.3125	#REF!	#REF!	#REF!
LaurierLS	SC_1-3	Dark Brown	0.67	0.85	0.89	0.32	1.47	0.955056	0.376471	0.445	0.445	0.622114
LaurierLS	SC_1-4	Dark Brown	0.22	0.4	0.36	0.13	0.48	1.11111	0.325	0.18	0.18	0.101788
LaurierLS	SC_1-5	Translucent	0.33	0.38	0.44	0.13	0.61	0.863636	0.342105	0.22	0.22	0.152053
LaurierLS	SC_1-6	Dark Brown	0.51	0.75	0.76	0.34	1.37	0.986842	0.453333	0.38	0.38	0.453646
LaurierLS	SC_1-7	Light Brown	0.56	0.83	0.74	0.27	1.12	1.12162	0.325301	0.37	0.37	0.430084
LaurierLS	SC_1-8	Dark Brown	0.59	0.78	0.79	0.24	1.14	0.987342	0.307692	0.395	0.395	0.490167
LaurierLS	SC_1-9	Dark Brown	0.58	0.74	0.73	0.31	1.33	1.0137	0.418919	0.365	0.365	0.418539
LaurierLS	SC_1-10	Dark Brown	0.45	0.76	0.78	0.29	1.05	0.974359	0.381579	0.39	0.39	0.477836
LaurierLS	SC_1-11	Dark Brown	0.46	0.95	0.85		1.47	1.11765	0	0.425	0.425	0.56745
LaurierLS	SC_1-12	Dark Brown	0.63	0.89	0.79	0.38	1.38	1.12658	0.426966	0.395	0.395	0.490167
LaurierLS	SC_1-13	Dark Brown	0.38	0.79	0.81	0.21	0.79	0.975309	0.265823	0.405	0.405	0.5153
LaurierLS	SC_1-14	Dark Brown	0.36	0.91	0.74	0.18	0.65	1.22973	0.197802	0.37	0.37	0.430084
LaurierLS	SC_1-15	Dark Brown	0.64	0.84	0.79	0.29	1.32	1.06329	0.345238	0.395	0.395	0.490167
LaurierLS	SC_1-16	Dark Brown	0.38	0.57	0.62	0.2	0.96	0.919355	0.350877	0.31	0.31	0.301907
LaurierLS	SC_1-17	Dark Brown	0.72	1.05	1.05	0.39	1.49	1	0.371429	0.525	0.525	0.865901
LaurierLS	SC_1-18	Dark Brown	0.47	0.54	0.6	0.23	0.93	0.9	0.425926	0.3	0.3	0.282743
LaurierLS	SC_1-19	Dark Brown	0.62	0.79	0.8	0.32	1.26	0.9875	0.405063	0.4	0.4	0.502655
LaurierLS	SC_1-20	Dark Brown	0.53	0.73	0.78	0.27	1.26	0.935897	0.369863	0.39	0.39	0.477836
LaurierLS	SC_1-21	Dark Brown	0.46	0.89	0.87	0.34	1.15	1.02299	0.382022	0.435	0.435	0.594468
LaurierLS	SC_1-22	Dark Brown	0.52	0.65	0.73	0.26	1.08	0.890411	0.4	0.365	0.365	0.418539
LaurierLS	SC_1-23	Dark Brown	0.55	0.8	0.67		1.22	1.19403	0	0.335	0.335	0.352565
LaurierLS	SC_1-24	Dark Brown	0.55	0.78	0.85	0.31	1.27	0.917647	0.397436	0.425	0.425	0.56745
LaurierLS	SC_1-25	Dark Brown	0.43	0.89	0.83	0.33	1.09	1.07229	0.370787	0.415	0.415	0.541061
